# Supplementary material
Source: PubMed Central journal article supplement (PMC4855514)
Supplement: NIHMS754493-supplement-Supplement.pdf [file NIHMS754493-supplement-Supplement.pdf]

## Supplementary Online Content

Flegal KM, Kit BK, Orpana H, Graubard BI. Association of all-cause mortality with overweight and obesity using standard body mass index categories: a systematic review and meta-analysis. *JAMA*. doi:10.1001/jama.2012.113905

**eTable 1.** Search strategies

**eTable 2.** Included studies

**eTable 3.** Adjustment factors, exclusions, and our evaluation for included studies

**eTable 4.** Summary hazard ratios for all-cause mortality relative to normal weight for BMI 25-<30 by age, sex, region, and measurement type

**eTable 5.** Summary hazard ratios for all-cause mortality relative to normal weight for BMI  $\geq 30$  by age, sex, region and measurement type

**eTable 6.** Summary hazard ratios for all-cause mortality relative to normal weight for BMI 30-<35 by age, sex, region and measurement type

**eTable 7.** Summary hazard ratios for all-cause mortality relative to normal weight for BMI  $\geq 35$  by age, sex, region and measurement type

**eTable 8.** Summary hazard ratios all-cause mortality relative to normal weight by BMI category, adjustment and measurement type

**eTable 9.** Approximate hazard ratio estimates for overweight and obesity relative to normal weight constructed from selected recent large studies that used finer body mass index categories

**eFigure.** Study selection flow diagram

**eReferences**

This supplementary material has been provided by the authors to give readers additional information about their work.

## eTable 1. Search strategies

---

**Search 1: PubMed**, search through September 30, 2012

("anthropometry"[MeSH Terms] OR "body mass index"[MeSH Terms] OR "body weight"[MeSH Terms] OR "overweight"[MeSH Terms] OR "obesity"[MeSH Terms] OR "risk factors"[MeSH Major Topic] OR "life style"[MeSH Major Topic] OR "adiposity"[MeSH Terms]) AND ("mortality"[MeSH Major Topic] OR "survival rate"[MeSH Terms] OR "cause of death"[MeSH Terms] OR "obesity/mortality"[MeSH Terms] OR "overweight/mortality"[MeSH Terms] OR "heart diseases/mortality"[MeSH Major Topic] OR "cardiovascular diseases/mortality"[MeSH Major Topic] OR "metabolic syndrome X/mortality"[MeSH Major Topic]) NOT ("case reports"[Publication Type] OR "comment"[Publication Type] OR "editorial"[Publication Type] OR "letter"[Publication Type] OR "review"[Publication Type]) NOT ("perinatal"[Title/abstract] OR "neonatal"[Title/abstract] OR "infant"[Title/abstract] OR "infants"[Title/abstract]) AND "humans"[MeSH Terms]

---

**Search 2: PubMed**, search through September 30, 2012

(((((obesity) AND mortality) NOT laparoscopic) NOT editorial[Publication Type]) NOT review[Publication Type]) NOT letter[Publication Type].. Filters: 10 years, Humans

---

**Search 3: EMBASE**, search through September 30, 2012 'obesity' OR 'obesity'/exp OR obesity AND ('mortality' OR 'mortality'/exp OR mortality) AND ('human'/exp OR 'human') AND ('article'/it OR 'book'/it) AND [1995-2012]/py

---

**eTable 2.** Included studies

| First author, year           | Sample size | Number of deaths | Sex  | Baseline age in years: (Range/mean/median) | Years of follow-up (Max/mean/median) | Weight and height | Reference BMI category | Outcome BMI categories | Country or region: Sample                        |
|------------------------------|-------------|------------------|------|--------------------------------------------|--------------------------------------|-------------------|------------------------|------------------------|--------------------------------------------------|
| Al-Snih 2007 <sup>1</sup>    | 12 725      | 3 122            | M, F | 65+//                                      | 7//                                  | Self-report       | 18.5-<25               | 25<30, 30-<35,         | US: EPESE                                        |
| Arndt 2007 <sup>2</sup>      | 19 513      | 802              | M    | 25-64//                                    | 10//                                 | Measured          | <25                    | 25<30, 30-<35, ≥35     | Germany: construction workers                    |
| Arnlov 2009 <sup>3</sup>     | 1 758       | 788              | M    | 50 (all)//                                 | 33//30                               | Measured          | <25                    | 25-30, >30             | Sweden: Uppsala population                       |
| Atlantis 2010 <sup>4</sup>   | 1 000       | 409              | M, F | 65+//                                      | 12//                                 | Measured          | 18.5-<25               | 25-<30, ≥30            | Australia: MELSHA                                |
| Baldinger 2006 <sup>5</sup>  | 22 927      | 588              | M    | /39/                                       | 25/8.2//                             | Measured          | 18.5-<25               | 25-<30, ≥30            | Switzerland: Insured men                         |
| Batty 2006 <sup>6</sup>      | 14 400      | 8 886            | M    | 40-64/51.2/                                | 35//                                 | Measured          | 18.5-<25               | 25-<30, ≥30            | UK: Whitehall                                    |
| Bellocco 2010 <sup>7</sup>   | 40 729      | 1 811            | M, F | 7-94/50.3/                                 | 9.7//                                | Self-report       | <25                    | 25-<30, ≥30            | Sweden: National March cohort                    |
| Bessonova 2011 <sup>8</sup>  | 115 433     | 10 594           | F    | 22-83/53.1/                                | 13//                                 | Self-report       | 18.5-<25               | 25-<30, ≥30            | US: California Teachers Cohort                   |
| Bevilacqua 2011 <sup>9</sup> | 1 581       | 154              | M, F | 30+/55.6/                                  | 14//                                 | Measured          | 18.5-<25               | 25-<30, ≥30            | Brazil: Japanese-Brazilian Diabetes Study Group  |
| Blain 2010 <sup>10</sup>     | 1 300       | 410              | F    | 75+//79.6                                  | 8//                                  | Measured          | 18-<25                 | 25-<30, ≥30            | France: Osteoporosis study                       |
| Boggs 2011 <sup>11</sup>     | 33 916      | 706              | F    | 30-69//                                    | 13//                                 | Self-report       | 20-<25                 | 25<30, 30-<35, ≥35     | US: Black Women's Health Study                   |
| Cabrera 2005 <sup>12</sup>   | 575         | 88               | F    | 60+/72.5/                                  | 5//                                  | Measured          | 18.5-<25               | 25-<30, ≥30            | Brazil: outpatient cohort                        |
| Carlsson 2011 <sup>13</sup>  | 44 258      | 14 217           | M, F | 16-86//                                    | 35/25.7/                             | Self-report       | 18.5-<25               | 25-<30, ≥30            | Sweden: Twin Registry                            |
| Cesari 2009 <sup>14</sup>    | 576         | 121              | M, F | 65+/74.5/                                  | 6/5.1/                               | Measured          | <25                    | 25-<30, ≥30            | Italy: InCHIANTI study                           |
| Cohen 2012 <sup>15</sup>     | 76 614      | 5 280            | M, F | 40-79/53.1/                                | 8.9/5.2/                             | Self-report       | 20-<25                 | 25<30, 30-<35, 35-<40  | US: Southern Community Cohort Study              |
| Corrada 2006 <sup>16</sup>   | 13 451      | 11 203           | M, F | 44-101/73/                                 | 23//                                 | Self-report       | 18.5-<25               | 25-<30, ≥30            | US: Leisure World Cohort Study                   |
| Crespo 2002 <sup>17</sup>    | 9 136       | 1 445            | M    | 35-79//                                    | 12//                                 | Measured          | 18.5-<25               | 25-<30, ≥30            | US (Puerto Rico): Puerto Rico Heart Health Study |
| Faeh 2011 <sup>18</sup>      | 9 853       | 1 526            | M, F | 25-74/47.2/                                | 25/18.6                              | Measured          | 18.5-<25               | 25-<30, ≥30            | Switzerland: MONICA                              |
| Fang 2011 <sup>19</sup>      | 2 086       | N/A†             | M, F | 55+//                                      | 5//                                  | Measured          | 18.5-<25               | 25-<30                 | China: Beijing population sample                 |
| Farrell 2002 <sup>20</sup>   | 9 925       | 195              | F    | 20-79/42.9/                                | 26/11.4                              | Measured          | 18.5-<25               | 25-<30, ≥30            | US: ACLS                                         |
| Ferrie 2009 <sup>21</sup>    | 1 916       | 1 219            | M, F | 35-70/48.0/                                | 40//                                 | Measured          | 18.5-<25               | 25-<30, ≥30            | UK: General Post Office study                    |
| Flegal 2007 <sup>22</sup>    | 52 590      | 8 418            | M, F | ≥25//                                      | 20//                                 | Measured          | 18.5-<25               | 25<30, 30-<35, ≥35     | US:NHANES                                        |

© 2012 American Medical Association. All rights reserved.

| First author, year                | Sample size | Number of deaths | Sex  | Baseline age in years: (Range/mean/median) | Years of follow-up (Max/mean/median) | Weight and height | Reference BMI category | Outcome BMI categories | Country or region: Sample                                                                            |
|-----------------------------------|-------------|------------------|------|--------------------------------------------|--------------------------------------|-------------------|------------------------|------------------------|------------------------------------------------------------------------------------------------------|
| Flicker 2010 <sup>23</sup>        | 9 240       | 2 308            | M, F | 70-75/72.0/                                | 10//                                 | Self-report       | 18.5-<25               | 25-<30, ≥30            | Australia: Subsamples of the Australian Health in Men Study and Longitudinal Study of Women's Health |
| Fontaine 2012 <sup>24</sup>       | 2 758       | 923              | M, F | 25-64/43.5/                                | 14//                                 | Measured          | 18.5-<25               | 25<30, 30-<35, ≥35     | US: San Antonio Heart Study                                                                          |
| Fontaine 2012 <sup>24</sup>       | 1 625       | 419              | M, F | 60+/70.4/                                  | 9//                                  | Measured          | 18.5-<25               | 25<30, 30-<35, ≥35     | US: Sacramento Area Latino Study on Aging                                                            |
| Ford 2008 <sup>25</sup>           | 12 422      | 2 321            | F    | 70-75//                                    | 9//                                  | Self-report       | 18.5-<25               | 25-<30, ≥30            | Australia: Longitudinal Study on Women's Health                                                      |
| Freedman 2006 <sup>26</sup>       | 43 357      | 1 402            | M, F | 22-92//                                    | 19//                                 | Self-report       | 18.5-<25               | 25<30, 30-<35, ≥35     | US: Radiologic Technologists Study                                                                   |
| Fujino 2007 <sup>27</sup>         | 109 778     | 15 507           | M, F | 40-79//                                    | 15/12.7/                             | Self-report       | 18.5-<25               | 25-<30, ≥30            | Japan: Japan Collaborative Cohort Study                                                              |
| Gale 2007 <sup>28</sup>           | 348         | 315              | M, F | ≥65/74.6/                                  | 24//                                 | Measured          | 18.5-<25               | 25-<30, ≥30            | UK: population samples from 8 regions                                                                |
| Gelber 2007 <sup>29</sup>         | 97 567      | 4 803            | M    | 40-80/55.9/                                | 6.6//5.7                             | Self-report       | <25                    | 25<30, 30-<35, ≥35     | US: Physicians Health Study                                                                          |
| Gray 2010 <sup>30</sup>           | 1 503       | 255              | M, F | 16-35/27.9/                                | 42//39.6                             | Self-report       | <25                    | 25-<30, ≥30            | UK (Scotland): Two Midspan studies (Main and Collaborative)                                          |
| Greenberg 2007 <sup>31</sup>      | 12 457      | 606              | M, F | 51-70//                                    | 5.3//                                | Measured          | 18.5-<25               | 25<30, 30-<35, ≥35     | US: ARIC                                                                                             |
| Gu 2006 <sup>32</sup>             | 154 736     | 17 687           | M, F | ≥40/55/                                    | /8.3/                                | Measured          | 18.5-<25               | 25-<30, ≥30            | China: national sample                                                                               |
| Haapenen-Niemi 2000 <sup>33</sup> | 2 212       | 295              | M, F | 35-63//                                    | 16//                                 | Self-report       | 20-<25                 | 25-<30, ≥30            | Finland: Regionally representative cohort                                                            |
| Hanson 1995 <sup>34</sup>         | 1 814.      | 249              | M, F | ≥20/30.5/                                  | 25.1//7.7                            | Measured          | <25                    | 25<30, 30-<35, 35-<40  | US: Pima Indian study                                                                                |
| Heir 2011 <sup>35</sup>           | 1 086       | 309              | M    | 40-59/49.6/                                | 27//                                 | Measured          | <25                    |                        | Norway: healthy employees                                                                            |
| Hjartaker 2005 <sup>36</sup>      | 102 446     | 1 071            | F    | 30-50/40.5/                                | 10/9.1                               | Self-report       | 18.5-<25               | 25-<30, ≥30            | Norway-Sweden: Norwegian-Swedish Women's Lifestyle and Health Cohort Study                           |
| Hotchkiss 2010 <sup>37</sup>      | 20 117      | 1 280            | M, F | 18-86/45.6/                                | 12//                                 | Measured          | 18.5-<25               | 25-<30, ≥30            | UK (Scotland): Scottish Health Surveys                                                               |
| Hu 2005 <sup>38</sup>             | 47 212      | 7 394            | M, F | 25-64/43.4/                                | /17.7/                               | Measured          | 18.5-<25               | 25-<30, ≥30            | Finland: Various population surveys                                                                  |

© 2012 American Medical Association. All rights reserved.

| First author, year             | Sample size | Number of deaths | Sex  | Baseline age in years: (Range/mean/median) | Years of follow-up (Max/mean/median) | Weight and height | Reference BMI category | Outcome BMI categories | Country or region: Sample                          |
|--------------------------------|-------------|------------------|------|--------------------------------------------|--------------------------------------|-------------------|------------------------|------------------------|----------------------------------------------------|
| Ioachimescu 2010 <sup>39</sup> | 5 904       | 275              | M, F | /55/                                       | 11//5.3                              | Measured          | 18.5-<25               | 25-<30, ≥30            | US: Cleveland Clinic                               |
| Iribarren 2005 <sup>40</sup>   | 5 115       | 127              | M, F | 18-30//                                    | 16//                                 | Measured          | 18.5-<25               | 25-<30, ≥30            | US: CARDIA                                         |
| Iversen 2010 <sup>41</sup>     | 10 059      | 877              | F    | /56.1/                                     | 12//11.8                             | Self-report       | 18.5-<25               | 25-<30, ≥30            | UK: subsample of the RCGP Oral Contraception Study |
| Janssen 2007 <sup>42</sup>     | 4 968       | 1 464            | M, F | ≥65//                                      | 9//                                  | Measured          | 20-<25                 | 25-<30, ≥30            | US: Cardiovascular Health Study                    |
| Janssen 2008 <sup>43</sup>     | 3 288       | 1 845            | M, F | ≥70/71/                                    | //10.6                               | Measured          | 20-<25                 | 25-<30, ≥30            | US: Framingham Heart Study                         |
| Jerant 2012 <sup>44</sup>      | 50 994      | 1 683            | M, F | 18-90//                                    | 6//                                  | Self-report       | 20-<25                 | 25<30, 30-<35, ≥35     | US: Medical Care Expenditure Panel Survey          |
| Jonsson 2002 <sup>45</sup>     | 22 025      | 2 674            | M    | 27-61/43.7/                                | 23//                                 | Measured          | 20-<25                 | 25-<30, ≥30            | Sweden: Malmo Preventive Project                   |
| Katzmarzyk 2001 <sup>46</sup>  | 10 725      | 593              | M, F | 20-69//                                    | 13/12.4/                             | Measured          | 18.5-<25               | 25<30, 30-<35, ≥35     | Canada: Canada Fitness Survey                      |
| Katzmarzyk 2012 <sup>47</sup>  | 10 522      | 1 148            | M, F | 18-74/43.5/                                | 19.1/13.9                            | Measured          | 18.5-<25               | 25<30, 30-<35, ≥35     | Canada: Canadian Heart Health Surveys              |
| Keller 2005 <sup>48</sup>      | 539         | 207              | M, F | ≥65//                                      | 10//                                 | Measured          | 18.5-<25               | 25-<30, ≥30            | Canada: Canadian Study of Health and Aging         |
| Kreuger 2004 <sup>49</sup>     | 45 162      | 11 964           | M, F | ≥60//                                      | 10/                                  | Self-report       | 18.5-<25               | 25<30, 30-<35, 35-<40  | US: National Health Interview Survey               |
| Lahmann 2002 <sup>50</sup>     | 27 716      | 958              | M, F | 46-73/58.1/                                | /5.7                                 | Measured          | <25                    | 25-<30, ≥30            | Sweden: Malmo Diet and Cancer Study                |
| Lakoski 2011 <sup>51</sup>     | 16 486      | 927              | M, F | ≥45/64/                                    | 6//                                  | Measured          | 20-<25                 | 25<30, 30-<35, ≥35     | US: REGARDS study.                                 |
| Lang 2008 <sup>52</sup>        | 3 793       | 393              | M, F | ≥65/72.8/                                  | 5//                                  | Measured          | 20-<25                 | 25<30, 30-<35, ≥35     | UK: ELSA                                           |
| Lantz 2010 <sup>53</sup>       | 3 617       | 1 409            | M, F | ≥25//                                      | 19/                                  | Self-report       | 18.5-<25               | 25-<30, ≥30            | US: Americans' Changing Lives study                |
| Lawlor 2006 <sup>54</sup>      | 15 344      | 10 261           | M, F | 45-64/54.3                                 | //29                                 | Measured          | 18.5-<25               | 25-<30, ≥30            | UK (Scotland): Renfrew-Paisley (Midspan study)     |
| Lawlor 2006 <sup>54</sup>      | 4 016       | 2 957            | M    | 45-64/51.7                                 | //32                                 | Measured          | 18.5-<25               | 25-<30, ≥30            | UK (Scotland): Collaborative (Midspan study)       |
| Leitzmann 2011 <sup>55</sup>   | 185 412     | 15 563           | M, F | 51-71/62.9/                                | 9//                                  | Self-report       | 18.5-<25               | 25<30, 30-<35, ≥35     | US: NIH-AARP Diet and Health Study                 |
| Lisko 2011 <sup>56</sup>       | 257         | 133              | M, F | 89-91//                                    | 4//                                  | Measured          | 18.5-<25               | 25-<30, ≥30            | Finland: Vitality 90+                              |

© 2012 American Medical Association. All rights reserved.

| First author, year                  | Sample size | Number of deaths | Sex  | Baseline age in years: (Range/mean/median) | Years of follow-up (Max/mean/median) | Weight and height | Reference BMI category | Outcome BMI categories | Country or region: Sample                           |
|-------------------------------------|-------------|------------------|------|--------------------------------------------|--------------------------------------|-------------------|------------------------|------------------------|-----------------------------------------------------|
| Locher 2007 <sup>57</sup>           | 983         | 147              | M, F | ≥65/75.3/                                  | 3//                                  | Measured          | 18.5-<25               | 25<30, 30-<35, ≥35     | US: UAB Study of Aging                              |
| Lubin 2003 <sup>58</sup>            | 632         | 151              | M, F | 41-70/55.2/                                | 18//                                 | Measured          | <25                    | 25-<30, ≥30            | Israel: cohort subsample                            |
| Luchsinger 2008 <sup>59</sup>       | 1 372       | 479              | M, F | ≥65/78.3/77                                | 9/7.0                                | Measured          | 18.5-<25               | 25-<30, ≥30            | US: New York City cohort                            |
| Ma 2011 <sup>60</sup>               | 112 328     | 3 178            | M, F | 18-39/29.3/                                | 20/16/16.1                           | Self-report       | 18.5-<25               | 25<30, 30-<35, ≥35     | US: National Health Interview Survey                |
| Majer 2011 <sup>61</sup>            | 66 331      | 950              | M, F | 15-90/46.9/                                | 4/2.6/                               | Self-report       | 18.5-<25               | 25-30, >30             | Europe: ECHP (non disabled)                         |
| McAuley 2010 <sup>62</sup>          | 12 417      | 2 801            | M    | 40-70/57/                                  | 22.9/7.7/                            | Measured          | 18.5-<25               | 25<30, 30-<35, ≥35     | US: Veterans                                        |
| McTigue 2006 <sup>63</sup>          | 83 691      | 4 302            | F    | 50-79//                                    | 9.9/7/                               | Measured          | 18.5-<25               | 25<30, 30-<35, 35-<40  | US: WHI Observational Study                         |
| Mehta 2009 <sup>64</sup>            | 6 453       | 1 301            | M, F | 50-61/55.5/                                | 12//                                 | Self-report       | 18.5-<25               | 25<30, 30-<35, ≥35     | US: Health and Retirement Study                     |
| Miller 2002 <sup>65</sup>           | 1 396       | 579              | M, F | ≥70/77.9/                                  | 8//                                  | Measured          | 20-<25                 | 25-30, >30             | Australia: Australian Longitudinal Study of Ageing  |
| Monteverde 2010 <sup>66</sup>       | 7 880       | 465              | M, F | ≥59//                                      | 3//                                  | Self-report       | 18.5-<25               | 25<30, 30-<35, ≥35     | Mexico: Mexican Health and Aging Study              |
| Nagai 2012 <sup>67</sup>            | 43 972      | 5 707            | M, F | 40-79/58.8/                                | 13//                                 | Self-report       | 18.5-<25               | 25-<30, ≥30            | Japan: Ohsaki Cohort Study                          |
| Nechuta 2010 <sup>68</sup>          | 71 243      | 2 860            | F    | 40-70//                                    | /9                                   | Measured          | 18.5-<25               | 25-<30, ≥30            | China: Shanghai women .                             |
| Niedhammer 2011 <sup>69</sup>       | 4 118       | 291              | M, F | <70//                                      | 12.5//                               | Self-report       | 18.5-<25               | 25-30, >30             | France: Lorhandicap cohort                          |
| Orpana 2009 <sup>70</sup>           | 11 326      | 1 929            | M, F | ≥25//                                      | 12//                                 | Self-report       | 18.5-<25               | 25<30, 30-<35, ≥35     | Canada: 1994/1995 National Population Health Survey |
| Osler 2001 <sup>71</sup>            | 5 610       | 586              | M, F | 30-70//                                    | 16//15                               | Measured          | 20-<25                 | 25-<30, ≥30            | Denmark: MONICA                                     |
| Pednekar 2008 <sup>72</sup>         | 147 097     | 13 001           | M, F | ≥35//                                      | 12//                                 | Measured          | 18.5-<25               | 25-<30, ≥30            | India: Mumbai population study                      |
| Petursson 2011 <sup>73</sup>        | 62 223      | 5 169            | M, F | 20-79/47.1/                                | 12.5/12/                             | Measured          | 18.5-<25               | 25<30, 30-<35, ≥35     | Norway: HUNT-2                                      |
| Ringback Weitoft 2008 <sup>74</sup> | 23 580      | 2 306            | M, F | 16-74//                                    | 12//                                 | Self-report       | 18.5-<25               | 25-<30, ≥30            | Sweden: Swedish Survey of Living Conditions         |
| Seccariccia 1998 <sup>75</sup>      | 63 036      | 1 373            | M, F | 20-69//                                    | 6//                                  | Measured          | 20-<25                 | 25<30, 30-<35, ≥35     | Italy: RIFLE pooling project                        |
| Seidell 1996 <sup>76</sup>          | 48 287      | 1 319            | M, F | 30-54//                                    | 20/12                                | Measured          | 18.5-<25               | ≥30                    | Netherlands: Prospective cohort study in 5 towns    |

© 2012 American Medical Association. All rights reserved.

| First author, year             | Sample size | Number of deaths | Sex  | Baseline age in years: (Range/mean/median) | Years of follow-up (Max/mean/median) | Weight and height | Reference BMI category | Outcome BMI categories | Country or region: Sample                                 |
|--------------------------------|-------------|------------------|------|--------------------------------------------|--------------------------------------|-------------------|------------------------|------------------------|-----------------------------------------------------------|
| Simpson 2007 <sup>77</sup>     | 31 313      | 2 822            | M, F | 27-75//                                    | //11                                 | Measured          | 18.5-<25               | 25-<30, ≥30            | Australia: Melbourne Collaborative Cohort Study           |
| Sonestedt 2011 <sup>78</sup>   | 22 799      | 3 452            | M, F | 44-74//                                    | 12//                                 | Measured          | 18.5-<25               | 30-35, ≥35             | Sweden: Malmo Diet and Cancer Study                       |
| Stessmann 2009 <sup>79</sup>   | 2 408       | 733              | M, F | 70 (all)//                                 | 18//                                 | Measured          | 18.5-<25               | 25-<30, ≥30            | Israel: Jerusalem Longitudinal Study                      |
| Stevens 2000 <sup>80</sup>     | 297 231     | N/A†             | M, F | ≥30//                                      | 11//                                 | Self-report       | 18.5-<25               | 25-<30, ≥30            | US: CPS I                                                 |
| Strawbridge 2000 <sup>81</sup> | 6 253       | 1 295            | M, F | 21-75//                                    | 31//                                 | Self-report       | 18.5-<25               | 25-<30, 30-<35, ≥35    | US: Alameda Co. Study                                     |
| Suadicani 2009 <sup>82</sup>   | 2 982       | 1 184            | M    | 53-75/63/                                  | 16//                                 | Measured          | 20-<25                 | ≥30                    | Denmark: Copenhagen Male Study                            |
| Sui 2007 <sup>83</sup>         | 2 603       | 450              | M, F | ≥60/64.4/                                  | 24/12                                | Measured          | 18.5-<25               | 25-<30, 30-<35, ≥35    | US: ACLS                                                  |
| Takata 2007 <sup>84</sup>      | 697         | 107              | M, F | 80(all)//                                  | 4//                                  | Measured          | 18.5-<25               | 25-<30                 | Japan: Community cohort                                   |
| Taylor 2001 <sup>85</sup>      | 4 208       | N/A†             | M, F | ≥65//                                      | 1//                                  | Self-report       | 18.5-<25               | 25-<30, 30-<35, ≥35    | US: community sample                                      |
| Tice 2006 <sup>86</sup>        | 17 748      | 1886             | F    | 55-80/68/                                  | 9//                                  | Measured          | 18.5-<25               | 25-<30, 30-<35, ≥35    | US: Post-menopausal women screened for intervention trial |
| Tsai 2006 <sup>87</sup>        | 7 139       | 970              | M, F | 30-69//42                                  | 20//                                 | Measured          | 18.5-<25               | 25-<30, ≥30            | US: Shell Oil employees                                   |
| Tsai 2008 <sup>88</sup>        | 33 259      | 2 095            | M, F | ≥40/50.9/                                  | //15                                 | Measured          | 18.5-<25               | 25-<30, ≥30            | Taiwan: Sample of civil servants and teachers             |
| Uretsky 2010 <sup>89</sup>     | 3 673       | 496              | M, F | /60/                                       | /7.5/                                | Measured          | 18.5-<25               | 25-<30, ≥30            | US: Patients referred for testing who had normal results  |
| Van Dam 2008 <sup>90</sup>     | 77 782      | 8 882            | F    | 34-59//                                    | 24//                                 | Self-report       | 18.5-<25               | 25-<30, ≥30            | US: Nurses' Health Study                                  |
| Visscher 2000 <sup>91</sup>    | 1 565       | 396              | M    | 50-69//                                    | 15                                   | Measured          | 18.5-<25               | 25-<30, ≥30            | Europe: Seven Countries Study                             |
| Visscher 2004 <sup>92</sup>    | 10 318      | 1 184            | M, F | 20-92/45/                                  | 15//                                 | Measured          | 18.5-<25               | 25-<30, ≥30            | Finland:12 municipalities                                 |
| Walter 2009 <sup>93</sup>      | 5 980       | 2 388            | M, F | ≥55/68.9/                                  | 15//                                 | Measured          | 18.5-<25               | 25-<30, 30-<35, ≥35    | Netherlands:The Rotterdam Study                           |
| Wandell 2009 <sup>94</sup>     | 2 422       | 562              | M, F | 18-64//                                    | 26//                                 | Measured          | 20-<25                 | 25-<30, ≥30            | Sweden: Stockholm population sample                       |
| Wannamethee 2007 <sup>95</sup> | 4 107       | 713              | M    | 60-79//                                    | 7/6                                  | Measured          | 18.5-<25               | ≥30                    | UK: British Regional Heart Study                          |
| Yates 2008 <sup>96</sup>       | 2 357       | 1 387            | M    | 66-84/72/                                  | //14.3                               | Self-report       | <25                    | 25-<30, ≥30            | US: Physicians' Health Study                              |

© 2012 American Medical Association. All rights reserved.

| First author, year            | Sample size | Number of deaths | Sex  | Baseline age in years: (Range/mean/median) | Years of follow-up (Max/mean/median) | Weight and height | Reference BMI category | Outcome BMI categories | Country or region: Sample      |
|-------------------------------|-------------|------------------|------|--------------------------------------------|--------------------------------------|-------------------|------------------------|------------------------|--------------------------------|
| Zunzunegui 2012 <sup>97</sup> | 1 008       | 672              | M, F | 65+//74.6                                  | 16//11.6                             | Self-report       | 18.5-<25               | 25<30, 30-<35, ≥35     | Spain: Aging in Leganes cohort |

† N/A=not available

Abbreviations: Aerobics Center Longitudinal Study (ACLS); Cancer Prevention Study (CPS); Coronary Artery Risk Development in Young Adults (CARDIA); English Longitudinal Study of Ageing (ELSA), Established Populations for Epidemiologic Studies of the Elderly (EPESE); European Community Household Panel (ECHP); Invecchiare in Chianti (InCHIANTI) study; Melbourne Longitudinal Studies on Healthy Ageing (MELSHA) ; Multinational Monitoring of trends and determinants in Cardiovascular disease (MONICA); National Health and Nutrition Examination Survey (NHANES); Nord-Trøndelag Health Study (HUNT 2); Reasons for Geographic and Racial Differences in Stroke study (REGARDS); Risk Factors and Life Expectancy (RIFLE); Royal College of General Practitioners (RCGP); University of Alabama at Birmingham (UAB); United States (US); United Kingdom (UK) Women's Health Initiative (WHI)



**eTable 3.** Adjustment factors, exclusions, and our evaluation for studies in **eTable 2**

| Study                        | Adjusted for                                                                                                                                                                                                                                                                                                                  | Inclusions/exclusions (other than missing data)                                                                                                                          | Evaluation                   |
|------------------------------|-------------------------------------------------------------------------------------------------------------------------------------------------------------------------------------------------------------------------------------------------------------------------------------------------------------------------------|--------------------------------------------------------------------------------------------------------------------------------------------------------------------------|------------------------------|
| Al-Snih 2007 <sup>1</sup>    | Age, sex, smoking status, race/ethnicity, marital status, level of formal education, comorbidity (cancer, hypertension, diabetes mellitus, or a hip fracture, or had ever had a heart attack or stroke) and EPESE site                                                                                                        | Those with any limitations in ADL at baseline were excluded                                                                                                              | 2. Possible over-adjustment. |
| Arndt 2007 <sup>2</sup>      | Age, smoking status, nationality, and alcohol consumption                                                                                                                                                                                                                                                                     | Men only. First 3 yrs of mortality excluded                                                                                                                              | 1. Adequately adjusted       |
| Arnlov 2009 <sup>3</sup>     | Age, smoking status and LDL cholesterol                                                                                                                                                                                                                                                                                       | Included men only. Men with diabetes or history of cardiovascular hospitalization excluded at baseline [We used only findings for men without metabolic syndrome ]       | 2. Possible over-adjustment  |
| Atlantis 2010 <sup>4</sup>   | Age, sex, smoking, instrumental activities of daily living, social activity, cognitive impairment and cardiovascular disease                                                                                                                                                                                                  | Limited to community dwellers                                                                                                                                            | 2. Possible over-adjustment  |
| Baldinger 2006 <sup>5</sup>  | Age, calendar year, blood pressure level, smoking, impaired glucose metabolism, history of other disease                                                                                                                                                                                                                      | Men only. Limited to men who underwent a thorough medical examination for high-sum assured life insurance coverage                                                       | 2. Possible over-adjustment. |
| Batty 2006 <sup>6</sup>      | Age, sex, age, employment grade, physical activity, smoking habit, marital status, disease at entry, and weight loss in the previous year, BP lowering medication, height adjusted FEV1, systolic BP, diastolic BP, plasma cholesterol, blood glucose (in normoglycaemic patients), glucose intolerance, and diabetes status. | Male British civil servants only. Results stratified by presence of absence of CHD at baseline. [We selected the results only for men without existing CHD at baseline ] | 2. Possible over-adjustment. |
| Bellocco 2010 <sup>7</sup>   | Age at enrollment, sex, physical activity, cigarette smoking status, alcohol drinking, use of vitamins and minerals, and educational level in men; further adjusted for contraceptive pill use and hormone therapy replacement in women                                                                                       | History of cancer or CVD at baseline                                                                                                                                     | 1 Adequately adjusted,       |
| Bessonova 2011 <sup>8</sup>  | Age, sex, race, hormone therapy, physical activity, diabetes, co-morbidities (including hypertension, heart attack, stroke and any cancer), smoking status, alcohol consumption, percent daily calories from fat, weight change (in kg) from age 18 to baseline                                                               | Women only. Excluded 1 year of follow-up                                                                                                                                 | 2. Possible-over-adjustment. |
| Bevilacqua 2011 <sup>9</sup> | Unadjusted                                                                                                                                                                                                                                                                                                                    | None mentioned                                                                                                                                                           | 3. Possible under-adjustment |

| Study                       | Adjusted for                                                                                                                                                                                                                                                                                                                                                           | Inclusions/exclusions (other than missing data)                                                                                                                                                                                       | Evaluation                    |
|-----------------------------|------------------------------------------------------------------------------------------------------------------------------------------------------------------------------------------------------------------------------------------------------------------------------------------------------------------------------------------------------------------------|---------------------------------------------------------------------------------------------------------------------------------------------------------------------------------------------------------------------------------------|-------------------------------|
| Blain 2010 <sup>10</sup>    | Age                                                                                                                                                                                                                                                                                                                                                                    | Women only. Community-dwelling sample “ study included only high-functioning women aged 75 years or older, able to walk independently without a cane and in excellent physical and cognitive health” First year of mortality excluded | 3. Possible under-adjustment. |
| Boggs 2011 <sup>11</sup>    | Education, marital status, physical activity and alcohol consumption                                                                                                                                                                                                                                                                                                   | Women only. Excluded women with a history of cancer or cardiovascular disease. Primary analyses limited to never smokers.                                                                                                             | 1. Adequately adjusted.       |
| Cabrera 2005 <sup>12</sup>  | Unadjusted                                                                                                                                                                                                                                                                                                                                                             | Women only. Excluded women with cancer other than basal cell skin cancer and excluded the first 6 months of mortality                                                                                                                 | 3 Possible under-adjustment   |
| Carlsson 2011 <sup>13</sup> | Age as timeline, sex-specific, adjusted for smoking                                                                                                                                                                                                                                                                                                                    | Excluded first 2 years of mortality                                                                                                                                                                                                   | 1. Adequately adjusted        |
| Cesari 2009 <sup>14</sup>   | age, sex, site, smoking, education, Mini-Mental State Examination score, Center for Epidemiological Studies-Depression scale score, physical activity, congestive heart failure, coronary artery disease, hypertension, peripheral artery disease, respiratory disease, osteoarthritis, stroke, interleukin-6 , C-reactive protein, and tumor necrosis factor- alpha . | None mentioned [We excluded the group with sarcopenia]                                                                                                                                                                                | 2. Possible over-adjustment   |
| Cohen 2012 <sup>15</sup>    | Age, sex, education; income, source (community health center vs.general population); cigarette smoking, alcohol consumption                                                                                                                                                                                                                                            | Excluded first year of mortality. Restricted to those not under cancer treatment in the preceding year                                                                                                                                | 1. Adequately adjusted        |
| Corrada 2006 <sup>16</sup>  | Age at entry, sex, smoking, “active” activities (seven categories) and history of hypertension, angina, myocardial infarction, stroke, diabetes, arthritis, and cancer                                                                                                                                                                                                 | Excluded first 5 years of mortality                                                                                                                                                                                                   | 2. Possible over-adjustment   |
| Crespo 2002 <sup>17</sup>   | Age, sex, physical activity smoking, education; urban residence (rural or urban); hypertension and high blood cholesterol                                                                                                                                                                                                                                              | Restricted to men free of coronary disease at Exam 1 who survived for at least 3 years after baseline                                                                                                                                 | 2. Possible over-adjustment   |
| Faeh 2011 <sup>18</sup>     | age, sex , survey wave, diet, physical activity, smoking and educational level                                                                                                                                                                                                                                                                                         | None mentioned                                                                                                                                                                                                                        | 1. Adequately adjusted        |
| Fang 2011 <sup>19</sup>     | age, sex, region, blood pressure history                                                                                                                                                                                                                                                                                                                               | None mentioned                                                                                                                                                                                                                        | 2 Possible over-adjustment    |

| Study                        | Adjusted for                                                                                                                                                                                                                                             | Inclusions/exclusions (other than missing data)                                                                   | Evaluation                    |
|------------------------------|----------------------------------------------------------------------------------------------------------------------------------------------------------------------------------------------------------------------------------------------------------|-------------------------------------------------------------------------------------------------------------------|-------------------------------|
| Farrell 2002 <sup>20</sup>   | age, sex, smoking status, baseline health status (reported myocardial infarction, stroke, hypertension, diabetes, cancer) at the time of their baseline examination or had an abnormal resting or exercise electrocardiogram), cardiorespiratory fitness | None mentioned                                                                                                    | 2 Possible over-adjustment    |
| Ferrie 2009 <sup>21</sup>    | Age and sex                                                                                                                                                                                                                                              | Limited to employees                                                                                              | 3. Possible under-adjustment. |
| Flegal 2007 <sup>22</sup>    | Age, sex, smoking status, race/ethnicity, and alcohol consumption                                                                                                                                                                                        | Restricted to civilian non-institutionalized population                                                           | 1. Adequately adjusted        |
| Flicker 2010 <sup>23</sup>   | Age (narrow age range), sex. No adjustment mentioned for main analysis. Subsequent analyses stratified by both smoking and sedentary behavior and showed results almost identical to main analysis.                                                      | Included only women residing in metropolitan/urban areas, in order to correspond to male sample                   | 1. Adequately adjusted        |
| Fontaine 2012 <sup>24</sup>  | Age, sex and smoking                                                                                                                                                                                                                                     | None mentioned                                                                                                    | 1. Adequately adjusted        |
| Ford 2008 <sup>25</sup>      | Age, sex, smoking, self-rated health, physical activity, comorbidity score, marital status                                                                                                                                                               | Overrepresentation of women in rural and remote areas                                                             | 2. Possible over-adjustment   |
| Freedman 2006 <sup>26</sup>  | race/ethnicity, education, alcohol behavior, and year first worked as a radiologic technologist by decade                                                                                                                                                | Restricted to those with no history of myocardial infarction or cancer. [We used analyses for never-smokers only] | 1. Adequately adjusted        |
| Fujino 2007 <sup>27</sup>    | Age, sex and area of study                                                                                                                                                                                                                               | Excluded those with a history of cancer                                                                           | 3 Possible under-adjustment.  |
| Gale 2007 <sup>28</sup>      | Age, height, social class, smoking, reported change in weight, daily calorie intake, physical activity, diagnosed disease (unspecified) at baseline, grip strength .                                                                                     | Included only those living at home. [We used analyses for results after deleting first 5 years of mortality]      | 1. Adequately adjusted        |
| Gelber 2007 <sup>29</sup>    | Age, sex, smoking, pre-existing disease self-reported history of myocardial infarction, stroke, cancer or liver disease and their interactions with BMI, in addition to age, alcohol consumption and physical activity ("optimal model")                 | First 2 years of deaths.                                                                                          | 2. Possible over-adjustment   |
| Gray 2010 <sup>30</sup>      | Age, sex, smoking, bronchitis, social class, regular driving, height, systolic and diastolic blood pressure, forced expiratory volume, forced vital capacity, cardiothoracic ratio, alcohol                                                              | None mentioned                                                                                                    | 2. Possible over-adjustment   |
| Greenberg 2007 <sup>31</sup> | age in years, sex, race, smoking and alcohol consumption                                                                                                                                                                                                 | None mentioned                                                                                                    | 1. Adequately adjusted        |

| Study                             | Adjusted for                                                                                                                                                                                                                                                               | Inclusions/exclusions (other than missing data)                                                                   | Evaluation                  |
|-----------------------------------|----------------------------------------------------------------------------------------------------------------------------------------------------------------------------------------------------------------------------------------------------------------------------|-------------------------------------------------------------------------------------------------------------------|-----------------------------|
| Gu 2006 <sup>32</sup>             | Age, sex, cigarette smoking, alcohol consumption, physical activity, education, geographic region (north vs. south), and urbanization (urban vs. rural)                                                                                                                    | None mentioned                                                                                                    | 1. Adequately adjusted      |
| Haapenen-Niemi 2000 <sup>33</sup> | age, employment status, marital status, perceived health status, smoking status and alcohol consumption                                                                                                                                                                    | Excluded those with BMI<20 or who were unable for health reasons to participate in leisure time physical activity | 1. Adequately adjusted      |
| Hanson 1995 <sup>34</sup>         | age, sex, smoking, the time between the initial and baseline examinations and year of baseline examination, weight loss                                                                                                                                                    | [We selected results for non-diabetic persons only]                                                               | 1. Adequately adjusted      |
| Heir 2011 <sup>35</sup>           | Age, sex, fitness, blood pressure, cholesterol                                                                                                                                                                                                                             | Employees screened for being in good health at baseline. [We selected data for never smokers only]                | 2. Possible over-adjustment |
| Hjartaker 2005 <sup>36</sup>      | Age, smoking status, years of education, current level of physical activity                                                                                                                                                                                                | None mentioned                                                                                                    | 1. Adequately adjusted      |
| Hotchkiss 2010 <sup>37</sup>      | Age, sex, smoking status, alcohol consumption and year of survey                                                                                                                                                                                                           | None mentioned                                                                                                    | 1. Adequately adjusted      |
| Hu 2005 <sup>38</sup>             | Age, sex, study year, education, smoking status, physical activity, systolic blood pressure, cholesterol and diabetes at baseline                                                                                                                                          | Excluded those with a history of heart disease, stroke, heart failure, or cancer                                  | 2. Possible over-adjustment |
| Ioachimescu 2010 <sup>39</sup>    | Age, sex, smoking status, history of diabetes mellitus, systolic and diastolic blood pressure, and fasting LDL-C and HDL-C.                                                                                                                                                | Patients referred to the Preventive Cardiology Section for primary or secondary prevention of CVD                 | 2. Possible over-adjustment |
| Iribarren 2005 <sup>40</sup>      | Age, sex, smoking, race, physical activity, diabetes, liver disease, thyroid disease, hostility, social support, marital status                                                                                                                                            | None mentioned                                                                                                    | 2. Possible over-adjustment |
| Iversen 2010 <sup>41</sup>        | Age, sex, social class, parity, history of serious illness (ischaemic heart disease, hypertension, stroke, venous thromboembolism, malignancy, diabetes mellitus, asthma, or bronchitis) pack-years of smoking, weekly alcohol intake, and hours of physical activity/week | None mentioned                                                                                                    | 2. Possible over-adjustment |
| Janssen 2007 <sup>42</sup>        | age, sex, race, socioeconomic status, smoking, physical activity and prevalent disease (diabetes, coronary heart disease, congestive heart failure, stroke, cancer).                                                                                                       | Those with a history of cancer in the previous 5 years were excluded from the CHS sample                          | 2. Possible over-adjustment |
| Janssen 2008 <sup>43</sup>        | sex, age, smoking, alcohol, and the exam year at which the BMI measure was obtained                                                                                                                                                                                        | None mentioned                                                                                                    | 1. Adequately adjusted      |
| Jerant 2012 <sup>44</sup>         | Age, sex, race, education, income, health insurance, urban/rural, census region, smoking                                                                                                                                                                                   | Restricted to civilian non-institutionalized population                                                           | 1. Adequately adjusted      |

© 2012 American Medical Association. All rights reserved.

| Study                         | Adjusted for                                                                                                                                                                                                                                                                               | Inclusions/exclusions (other than missing data)                                                     | Evaluation                    |
|-------------------------------|--------------------------------------------------------------------------------------------------------------------------------------------------------------------------------------------------------------------------------------------------------------------------------------------|-----------------------------------------------------------------------------------------------------|-------------------------------|
| Jonsson 2002 <sup>45</sup>    | Age, sex, heart rate, hypertension, diabetes mellitus, hyperlipidaemia, smoking habits, self-reported health, sedentary leisure-time physical activity, history of cancer, history of angina pectoris, single status, socio-economic position and history of problematic drinking behavior | Exclusions for history of MI or stroke                                                              | 2. Possible over-adjustment   |
| Katzmarzyk 2001 <sup>46</sup> | Age, sex, smoking status, and alcohol consumption                                                                                                                                                                                                                                          | None mentioned                                                                                      | 1. Adequately adjusted        |
| Katzmarzyk 2012 <sup>47</sup> | Age, sex, exam year, smoking status, alcohol consumption and education                                                                                                                                                                                                                     | Excluded the first six months of follow-up                                                          | 1. Adequately adjusted        |
| Keller 2005 <sup>48</sup>     | Age, sex, smoking, weight loss, education, marital status, cognitive impairment                                                                                                                                                                                                            | Excluded the first 5 years of mortality and also those who developed dementia after the first 5 yrs | 1. Adequately adjusted        |
| Krueger 2004 <sup>49</sup>    | Age, sex, race/ethnicity, marital status, socioeconomic factors and smoking                                                                                                                                                                                                                | None mentioned                                                                                      | 1. Adequately adjusted        |
| Lahmann 2002 <sup>50</sup>    | Age, height, smoking status, leisure physical activity                                                                                                                                                                                                                                     | None mentioned                                                                                      | 1. Adequately adjusted        |
| Lakoski 2011 <sup>51</sup>    | Age, sex, race                                                                                                                                                                                                                                                                             | None mentioned                                                                                      | 3. Possible under-adjustment. |
| Lang 2008 <sup>52</sup>       | age, sex, level of education, wealth, income, smoking status, number of comorbidities, alcohol consumption                                                                                                                                                                                 | None mentioned                                                                                      | 1. Adequately adjusted        |
| Lantz 2010 <sup>53</sup>      | Age, sex, race, residence, education, income, smoking, alcohol use, physical activity, physical impairment, self-reported health                                                                                                                                                           | Non-institutionalized only                                                                          | 1. Adequately adjusted        |
| Lawlor 2006 <sup>54</sup>     | Age (stratified by sex and cohort)                                                                                                                                                                                                                                                         | None mentioned                                                                                      | 3. Possible under-adjustment  |
| Leitzmann 2011 <sup>55</sup>  | age sex, race/ethnicity, smoking status, alcohol intake                                                                                                                                                                                                                                    | None mentioned                                                                                      | 1. Adequately adjusted        |
| Lisko 2011 <sup>56</sup>      | chronic conditions (cardiovascular disease, cancer, diabetes, respiratory disease, infectious disease, and MMSE score of 0–22), functional status, smoking, and alcohol intake                                                                                                             | None mentioned                                                                                      | 2. Possible over-adjustment   |
| Locher 2007 <sup>57</sup>     | age, sex, race, smoking status, and comorbidities (based on Charlson Co-morbidity Index)                                                                                                                                                                                                   | Community dwelling                                                                                  | 2. Possible over-adjustment   |
| Lubin 2003 <sup>58</sup>      | Age, sex, smoking, ethnic origin, systolic blood pressure, physical activity, mean energy intake, fatty acid intake, percent energy from fat, fiber intake, serum cholesterol                                                                                                              | Free of diabetes or major chronic disease                                                           | 2. Possible over-adjustment   |

© 2012 American Medical Association. All rights reserved.

| <b>Study</b>                  | <b>Adjusted for</b>                                                                                                                                                                                                                                                     | <b>Inclusions/exclusions (other than missing data)</b>                                                                                                                                          | <b>Evaluation</b>           |
|-------------------------------|-------------------------------------------------------------------------------------------------------------------------------------------------------------------------------------------------------------------------------------------------------------------------|-------------------------------------------------------------------------------------------------------------------------------------------------------------------------------------------------|-----------------------------|
| Luchsinger 2008 <sup>59</sup> | Age, sex, education, ethnic group, cancer, current smoking, and dementia                                                                                                                                                                                                | None mentioned                                                                                                                                                                                  | 1. Adequately adjusted      |
| Ma 2011 <sup>60</sup>         | sex, age, education, race/ ethnicity, and smoking status                                                                                                                                                                                                                | Excluded those reporting BMI < 15 or BMI >99                                                                                                                                                    | 1. Adequately adjusted      |
| Majer 2011 <sup>61</sup>      | Age, sex, smoking, disability                                                                                                                                                                                                                                           | Results for never-smokers only                                                                                                                                                                  | 1. Adequately adjusted      |
| McAuley 2010 <sup>62</sup>    | age, ethnicity, examination year, test site, cardiovascular disease, (CVD), hypertension, dyslipidemia, diabetes mellitus, current smoking, and CVD medications                                                                                                         | Excluded patients with a history of implanted pacemaker, those who developed left bundle branch block during the test, and those who were clinically unstable or required emergent intervention | 2. Possible over-adjustment |
| McTigue 2006 <sup>63</sup>    | Age, sex, tobacco use, educational achievement, US region, and physical activity                                                                                                                                                                                        | Women only                                                                                                                                                                                      | 1. Adequately adjusted      |
| Mehta 2009 <sup>64</sup>      | Age, sex, race/ethnicity, marital status, SES (education, income, and wealth), behaviors (smoking status and physical activity).                                                                                                                                        | None mentioned                                                                                                                                                                                  | 1. Adequately adjusted      |
| Miller 2002 <sup>65</sup>     | Age, sex, marital status, smoking, self-rated health, activities of daily living, comorbidities (any cancer, arthritis, heart attack, heart condition, hypertension, ulcers, diabetes mellitus, respiratory disease, hernia, stroke), depression, cognitive performance | Community sample                                                                                                                                                                                | 2. Possible over-adjustment |
| Monteverde 2010 <sup>66</sup> | Age, sex, education and smoking                                                                                                                                                                                                                                         | None mentioned                                                                                                                                                                                  | 1 Adequately adjusted       |
| Nagai 2012 <sup>67</sup>      | Age, sex, smoking status, alcohol drinking, sports and physical exercise, time spent walking and education                                                                                                                                                              | Excluded participants with a history of cancer, myocardial infarction, stroke or kidney disease. Excluded the first year of follow-up                                                           | 1 Adequately adjusted       |
| Nechuta 2010 <sup>68</sup>    | Age, education, occupation, and income                                                                                                                                                                                                                                  | Women who reported ever drinking or ever smoking were excluded                                                                                                                                  | 1 Adequately adjusted       |
| Niedhammer 2011 <sup>69</sup> | Age, sex, smoking, SES, alcohol, biomechanical and physical exposures, temporary contract, low social support                                                                                                                                                           | None mentioned                                                                                                                                                                                  | 1 Adequately adjusted       |
| Orpana 2009 <sup>70</sup>     | Age, sex, self-reported smoking status, physical activity frequency, and alcohol consumption                                                                                                                                                                            | Limited to members of private households                                                                                                                                                        | 1. Adequately adjusted      |
| Osler 2001 <sup>71</sup>      | Age, sex, prudent diet score, self rated health, physical activity, smoking, and vocational education                                                                                                                                                                   | None mentioned                                                                                                                                                                                  | 1. Adequately adjusted      |
| Pednekar 2008 <sup>72</sup>   | Age, sex, education, religion, mother tongue and tobacco use.                                                                                                                                                                                                           | Very sick or bedridden                                                                                                                                                                          | 1. Adequately adjusted      |

© 2012 American Medical Association. All rights reserved.

| Study                               | Adjusted for                                                                                                                                                                                                                                                                             | Inclusions/exclusions (other than missing data)                                                                                                                                                                                                    | Evaluation                   |
|-------------------------------------|------------------------------------------------------------------------------------------------------------------------------------------------------------------------------------------------------------------------------------------------------------------------------------------|----------------------------------------------------------------------------------------------------------------------------------------------------------------------------------------------------------------------------------------------------|------------------------------|
| Petursson 2011 <sup>73</sup>        | Age, smoking and physical activity per week                                                                                                                                                                                                                                              | None mentioned                                                                                                                                                                                                                                     | 1. Adequately adjusted       |
| Ringback Weitoft 2008 <sup>74</sup> | Age, smoking, longstanding illness (not specified) and education                                                                                                                                                                                                                         | None mentioned                                                                                                                                                                                                                                     | 1. Adequately adjusted       |
| Seccariccia 1998 <sup>75</sup>      | Age, systolic blood pressure, serum cholesterol, and cigarette smoking                                                                                                                                                                                                                   | None mentioned                                                                                                                                                                                                                                     | 2. Possible over-adjustment  |
| Seidell 1996 <sup>76</sup>          | Age                                                                                                                                                                                                                                                                                      | None mentioned                                                                                                                                                                                                                                     | 3. Possible under-adjustment |
| Simpson 2007 <sup>77</sup>          | Adjusted for sex, age at attendance, country of birth, physical activity, alcohol intake, education, smoking status, living alone (men only), and family history of heart attack (men only); and stratified by "previous history of heart attack, angina, diabetes, stroke, and cancer." | None mentioned                                                                                                                                                                                                                                     | 1. Adequately adjusted       |
| Sonestedt 2011 <sup>78</sup>        | Age and sex                                                                                                                                                                                                                                                                              | Excluded those with a history of diabetes, cancer or cardiovascular disease                                                                                                                                                                        | 3. Possible under-adjustment |
| Stessmann 2009 <sup>79</sup>        | perceived economic hardship; subjective self-rated health; physical activity; smoking; activity of daily living dependency; and diagnoses of hypertension, diabetes mellitus, ischemic heart disease, and cancer                                                                         | None mentioned                                                                                                                                                                                                                                     | 2. Possible over-adjustment  |
| Stevens 2000 <sup>80</sup>          | Age, education and physical activity                                                                                                                                                                                                                                                     | Limited to white never smokers with no history of cancer or heart disease, no 10lb or more weight loss in past 2 years and who did not report being ill at baseline or feeling poorly in the previous month; first year of mortality also excluded | 1. Adequately adjusted       |
| Strawbridge 2000 <sup>81</sup>      | Age, sex, race/ethnicity, education, chronic bronchitis, cancer, cigarette smoking, and physical activity                                                                                                                                                                                | First year of follow-up excluded                                                                                                                                                                                                                   | 1. Adequately adjusted       |
| Suadicani 2009 <sup>82</sup>        | LTPA, cumulative tobacco consumption (cigarette equivalents), alcohol intake, and social class                                                                                                                                                                                           | Included only men without overt cardiovascular disease                                                                                                                                                                                             | 1. Adequately adjusted       |
| Sui 2007 <sup>83</sup>              | Age, sex, examination year, smoking, abnormal EKG, cardiovascular disease, diabetes, hypertension, hypercholesterolemia, fitness                                                                                                                                                         | Excluded those who did not reach 85% of predicted maximal heart rate (220-age)                                                                                                                                                                     | 2. Possible over-adjustment. |
| Takata 2007 <sup>84</sup>           | Age, sex, current outpatient status, smoking, drinking, weight loss, systolic blood pressure, physical activity, functional status, marital status, preexisting diseases, place of residence, and levels of total serum cholesterol and glucose                                          | None mentioned                                                                                                                                                                                                                                     | 2. Possible over-adjustment. |

© 2012 American Medical Association. All rights reserved.

| Study                          | Adjusted for                                                                                                                                                                                                                                                                                                                                   | Inclusions/exclusions (other than missing data)                                                                                                                       | Evaluation                   |
|--------------------------------|------------------------------------------------------------------------------------------------------------------------------------------------------------------------------------------------------------------------------------------------------------------------------------------------------------------------------------------------|-----------------------------------------------------------------------------------------------------------------------------------------------------------------------|------------------------------|
| Taylor 2001 <sup>85</sup>      | Age, sex, smoking, weight change, self-reported sickness, exercise level, drinking, education, cognition, proxy reporting                                                                                                                                                                                                                      | None mentioned                                                                                                                                                        | 1. Adequately adjusted.      |
| Tice 2006 <sup>86</sup>        | Age, sex, hypertension, diabetes mellitus, heart disease, stroke, breast cancer, no use of postmenopausal hormone therapy, recent weight loss, worse self-reported health status, current smoking, pack years of smoking, higher WHR, higher systolic blood pressure, higher heart rate, longer Up and Go Test times, and weaker grip strength | Postmenopausal women only                                                                                                                                             | 2. Possible over-adjustment  |
| Tsai 2006 <sup>87</sup>        | Age, sex, smoking status and other potential risk factors (ie, cholesterol, blood pressure, and fasting glucose).                                                                                                                                                                                                                              | Employed at beginning of follow-up                                                                                                                                    | 2. Possible over-adjustment  |
| Tsai 2008 <sup>88</sup>        | Age, sex, smoking status                                                                                                                                                                                                                                                                                                                       | None mentioned                                                                                                                                                        | 1. Adequately adjusted       |
| Uretsky 2010 <sup>89</sup>     | Age, sex, smoking, hypertension, diabetes, hypercholesterolemia, family history, race, history of chest pain, pharmacologic stress                                                                                                                                                                                                             | No history of heart disease; ischemia ruled out by single photon emission computed tomography (SPECT)                                                                 | 2 possible over-adjustment   |
| Van Dam 2008 <sup>90</sup>     | age (5 year categories), time period (12 periods), smoking, physical activity, alcohol consumption, healthy diet score                                                                                                                                                                                                                         | Excluded women with a history of CVD or cancer and non-drinkers who had previously had high alcohol consumption                                                       | 1. Adequately adjusted       |
| Visscher 2000 <sup>91</sup>    | Age, sex, study center                                                                                                                                                                                                                                                                                                                         | First 5 yrs of follow-up excluded. [We only tabulated results for never smokers]                                                                                      | 1. Adequately adjusted       |
| Visscher 2004 <sup>92</sup>    | Age, sex, smoking, geographical location, alcohol use                                                                                                                                                                                                                                                                                          | Included only never smokers                                                                                                                                           | 1 Adequately adjusted        |
| Walter 2009 <sup>93</sup>      | Age, sex, smoking status, pack years of cigarettes smoked in the past, alcohol consumption, education, income and living situation.                                                                                                                                                                                                            | Patients who reported unintentional wt loss of 3.5 kg or more in previous 18 months                                                                                   | 1 Adequately adjusted        |
| Wandell 2009 <sup>94</sup>     | Age, sex, care need level                                                                                                                                                                                                                                                                                                                      | None mentioned                                                                                                                                                        | 3. Possible under-adjustment |
| Wannamethee 2007 <sup>95</sup> | Age, social class, physical activity, cigarette smoking, alcohol intake, lung function, albumin, stroke, and cancer.                                                                                                                                                                                                                           | Included men ages 60-79 y without diagnosed heart failure [We selected results that excluded current smokers and recent exsmokers]                                    | 1 Adequately adjusted        |
| Yates 2008 <sup>96</sup>       | age, smoking status, alcohol intake, exercise frequency, hypertension, diabetes, hypercholesterolemia, angina, and treatment assignment                                                                                                                                                                                                        | Excluded those with a history of cancer (excluding non-melanoma skin cancer), myocardial infarction, transient cerebral ischemia or stroke, or other serious diseases | 2. Possible over-adjustment  |

© 2012 American Medical Association. All rights reserved.



| <b>Study</b>                  | <b>Adjusted for</b>                                                                             | <b>Inclusions/exclusions (other than missing data)</b> | <b>Evaluation</b>     |
|-------------------------------|-------------------------------------------------------------------------------------------------|--------------------------------------------------------|-----------------------|
| Zunzunegui 2012 <sup>97</sup> | Age, sex, smoking, education, chronic conditions, activities of daily living, physical activity | Excluded first year of follow-up                       | 1 Adequately adjusted |

**eTable 4.** Summary hazard ratios for all-cause mortality relative to normal weight for BMI 25-<30 by age, sex, region, and measurement type

| BMI category        | Baseline age category | Self-reported or measured height and weight |                      |                    | Measured height and weight |                      |                    | Self-reported height and weight |                      |                    |
|---------------------|-----------------------|---------------------------------------------|----------------------|--------------------|----------------------------|----------------------|--------------------|---------------------------------|----------------------|--------------------|
|                     |                       | Number of hazard ratios                     | Summary hazard ratio | I <sup>2</sup> (%) | Number of hazard ratios    | Summary hazard ratio | I <sup>2</sup> (%) | Number of hazard ratios         | Summary hazard ratio | I <sup>2</sup> (%) |
| Both men and women† |                       |                                             |                      |                    |                            |                      |                    |                                 |                      |                    |
|                     | All ages              | 52                                          | 0.89 (0.86-0.93)*    | 78.6               | 35                         | 0.91 (0.86-0.97)*    | 78.6               | 17                              | 0.86 (0.82-0.91)*    | 78.2               |
|                     | Mixed ages            | 35                                          | 0.89 (0.85-0.94)*    | 81.7               | 23                         | 0.91 (0.84-0.99)*    | 83.3               | 12                              | 0.87 (0.81-0.92)*    | 76.5               |
|                     | ≥ 65 only             | 17                                          | 0.89 (0.83-0.94)*    | 65.2               | 12                         | 0.91 (0.84-0.98)     | 44.9               | 5                               | 0.86 (0.76-0.96)*    | 84.6               |
| Men                 |                       |                                             |                      |                    |                            |                      |                    |                                 |                      |                    |
|                     | All ages              | 42                                          | 0.94 (0.90-0.99)*    | 84.8               | 28                         | 0.92 (0.88-0.97)*    | 71.4               | 14                              | 0.97 (0.88-1.06)*    | 90.0               |
|                     | Mixed ages            | 35                                          | 0.95 (0.90-1.00)*    | 86.8               | 24                         | 0.93 (0.88-0.97)*    | 73.9               | 11                              | 0.99 (0.89-1.09)*    | 91.0               |
|                     | ≥ 65 only             | 7                                           | 0.90 (0.82-0.99)     | 29.8               | 4                          | 0.81 (0.59-1.12)     | 47.0               | 3                               | 0.92 (0.85-1.00)     | 17.5               |
| Women               |                       |                                             |                      |                    |                            |                      |                    |                                 |                      |                    |
|                     | All ages              | 46                                          | 0.99 (0.94-1.03)*    | 82.9               | 26                         | 0.92 (0.87-0.98)*    | 71.0               | 20                              | 1.05 (0.99-1.12)*    | 83.5               |
|                     | Mixed ages            | 37                                          | 1.00 (0.95-1.05)*    | 84.4               | 20                         | 0.93 (0.87-0.99)*    | 75.4               | 17                              | 1.08 (1.01-1.14)*    | 81.6               |
|                     | ≥ 65 only             | 9                                           | 0.92 (0.84-1.00)     | 26.8               | 6                          | 0.88 (0.79-1.00)     | 0.0                | 3                               | 0.95 (0.83-1.09)     | 65.4               |
| US and Canada       |                       |                                             |                      |                    |                            |                      |                    |                                 |                      |                    |
|                     | All ages              | 58                                          | 0.92 (0.88-0.96)*    | 88.3               | 30                         | 0.90 (0.85-0.95)*    | 66.3               | 28                              | 0.95 (0.89-1.00)*    | 92.2               |
|                     | Mixed ages            | 44                                          | 0.93 (0.89-0.98)*    | 89.5               | 22                         | 0.90 (0.83-0.97)*    | 70.4               | 22                              | 0.96 (0.90-1.03)*    | 92.7               |
|                     | ≥ 65 only             | 14                                          | 0.89 (0.84-0.96)*    | 70.9               | 8                          | 0.89 (0.82-0.98)     | 53.2               | 6                               | 0.89 (0.79-1.00)*    | 82.4               |
| Europe              |                       |                                             |                      |                    |                            |                      |                    |                                 |                      |                    |
|                     | All ages              | 58                                          | 0.96 (0.92-1.00)*    | 79.5               | 43                         | 0.94 (0.90-0.98)*    | 68.9               | 15                              | 1.02 (0.92-1.12)*    | 83.2               |
|                     | Mixed ages            | 49                                          | 0.97 (0.93-1.01)*    | 81.9               | 34                         | 0.94 (0.91-0.98)*    | 73.5               | 15                              | 1.02 (0.92-1.12)*    | 83.2               |
|                     | ≥ 65 only             | 9                                           | 0.90 (0.81-1.00)     | 0.0                | 9                          | 0.90 (0.81-1.00)     | 0.0                | 0                               |                      |                    |
| Other regions       |                       |                                             |                      |                    |                            |                      |                    |                                 |                      |                    |
|                     | All ages              | 9                                           | 0.89 (0.85-0.93)     | 13.1               | 4                          | 0.87 (0.79-0.97)     | 34.8               | 5                               | 0.90 (0.85-0.94)     | 1.4                |
|                     | Mixed ages            | 2                                           | 0.83 (0.75-0.91)     | 5.1                | 2                          | 0.83 (0.75-0.91)     | 5.1                | 0                               |                      |                    |
|                     | ≥ 65 only             | 7                                           | 0.90 (0.86-0.94)     | 0.0                | 2                          | 0.98 (0.84-1.13)     | 0.0                | 5                               | 0.90 (0.85-0.94)     | 1.4                |

\* Significant heterogeneity (p<.05)

† Based only on hazard ratios from the studies that did not report results separately for men and women

© 2012 American Medical Association. All rights reserved.

**eTable 5.** Summary hazard ratios for all-cause mortality relative to normal weight for BMI  $\geq$  30 by age, sex, region and measurement type

| BMI category        | Baseline age category | Self-reported or measured height and weight |                      |                    | Measured height and weight |                      |                    | Self-reported height and weight |                      |                    |
|---------------------|-----------------------|---------------------------------------------|----------------------|--------------------|----------------------------|----------------------|--------------------|---------------------------------|----------------------|--------------------|
|                     |                       | Number of hazard ratios                     | Summary hazard ratio | I <sup>2</sup> (%) | Number of hazard ratios    | Summary hazard ratio | I <sup>2</sup> (%) | Number of hazard ratios         | Summary hazard ratio | I <sup>2</sup> (%) |
| Both men and women† |                       |                                             |                      |                    |                            |                      |                    |                                 |                      |                    |
|                     | All ages              | 24                                          | 1.01 (0.91-1.11)*    | 81.9               | 17                         | 1.00 (0.87-1.15)*    | 85.0               | 7                               | 1.00 (0.87-1.16)*    | 68.2               |
|                     | Mixed ages            | 15                                          | 1.02 (0.87-1.19)*    | 85.9               | 10                         | 1.02 (0.84-1.24)*    | 88.7               | 5                               | 1.00 (0.79-1.27)*    | 67.6               |
|                     | $\geq$ 65 only        | 9                                           | 0.99 (0.88-1.12)*    | 70.0               | 7                          | 0.97 (0.80-1.16)*    | 74.1               | 2                               | 1.05 (0.92-1.20)     | 61.9               |
| Men                 |                       |                                             |                      |                    |                            |                      |                    |                                 |                      |                    |
|                     | All ages              | 30                                          | 1.27 (1.18-1.37)*    | 74.4               | 22                         | 1.21 (1.13-1.30)*    | 58.6               | 8                               | 1.41 (1.26-1.59)*    | 62.8               |
|                     | Mixed ages            | 25                                          | 1.27 (1.18-1.38)*    | 78.2               | 19                         | 1.21 (1.12-1.30)*    | 63.1               | 6                               | 1.45 (1.28-1.65)*    | 65.5               |
|                     | $\geq$ 65 only        | 5                                           | 1.27 (1.08-1.49)     | 0.0                | 3                          | 1.25 (0.93-1.68)     | 0.0                | 2                               | 1.28 (1.02-1.61)     | 29.2               |
| Women               |                       |                                             |                      |                    |                            |                      |                    |                                 |                      |                    |
|                     | All ages              | 30                                          | 1.25 (1.15-1.36)*    | 87.4               | 17                         | 1.13 (1.04-1.24)*    | 56.7               | 13                              | 1.38 (1.24-1.54)*    | 89.3               |
|                     | Mixed ages            | 23                                          | 1.32 (1.22-1.44)*    | 86.9               | 12                         | 1.17 (1.08-1.28)*    | 53.0               | 11                              | 1.47 (1.34-1.61)*    | 83.8               |
|                     | $\geq$ 65 only        | 7                                           | 0.97 (0.81-1.18)*    | 59.6               | 5                          | 0.93 (0.70-1.23)     | 55.5               | 2                               | 1.02 (0.73-1.44)     | 82.9               |
| US and Canada       |                       |                                             |                      |                    |                            |                      |                    |                                 |                      |                    |
|                     | All ages              | 17                                          | 1.08 (0.95-1.24)*    | 94.6               | 10                         | 0.90 (0.73-1.11)*    | 86.4               | 7                               | 1.33 (1.17-1.53)*    | 94.3               |
|                     | Mixed ages            | 11                                          | 1.13 (0.97-1.32)*    | 94.7               | 6                          | 0.90 (0.64-1.27)*    | 88.5               | 5                               | 1.37 (1.19-1.58)*    | 94.5               |
|                     | $\geq$ 65 only        | 6                                           | 1.02 (0.85-1.23)*    | 83.5               | 4                          | 0.90 (0.67-1.21)*    | 86.6               | 2                               | 1.23 (0.97-1.56)     | 64.2               |
| Europe              |                       |                                             |                      |                    |                            |                      |                    |                                 |                      |                    |
|                     | All ages              | 47                                          | 1.27 (1.20-1.35)*    | 71.5               | 32                         | 1.22 (1.16-1.29)*    | 54.1               | 15                              | 1.36 (1.19-1.55)*    | 79.0               |
|                     | Mixed ages            | 40                                          | 1.30 (1.22-1.38)*    | 74.2               | 25                         | 1.24 (1.17-1.32)*    | 59.9               | 15                              | 1.36 (1.19-1.55)*    | 79.0               |
|                     | $\geq$ 65 only        | 7                                           | 1.08 (0.94-1.25)     | 0.0                | 7                          | 1.08 (0.94-1.25)     | 0.0                | 0                               |                      |                    |
| Other regions       |                       |                                             |                      |                    |                            |                      |                    |                                 |                      |                    |
|                     | All ages              | 8                                           | 1.01 (0.94-1.08)     | 12.3               | 4                          | 1.02 (0.93-1.12)     | 0.0                | 4                               | 1.02 (0.88-1.17)     | 57.2               |
|                     | Mixed ages            | 2                                           | 1.00 (0.90-1.11)     | 0.0                | 2                          | 1.00 (0.90-1.11)     | 0.0                | 0                               |                      |                    |
|                     | $\geq$ 65 only        | 6                                           | 1.03 (0.92-1.14)     | 36.2               | 2                          | 1.09 (0.89-1.34)     | 0.0                | 4                               | 1.02 (0.88-1.17)     | 57.2               |

\* Significant heterogeneity ( $p < .05$ )

† Based only on hazard ratios from the studies that did not report results separately for men and women

**eTable 6.** Summary hazard ratios for all-cause mortality relative to normal weight for BMI 30-<35 by age, sex, region and measurement type

| BMI category        | Baseline age category | Self-reported or measured height and weight |                      |                    | Measured height and weight |                      |                    | Self-reported height and weight |                      |                    |
|---------------------|-----------------------|---------------------------------------------|----------------------|--------------------|----------------------------|----------------------|--------------------|---------------------------------|----------------------|--------------------|
|                     |                       | Number of hazard ratios                     | Summary hazard ratio | I <sup>2</sup> (%) | Number of hazard ratios    | Summary hazard ratio | I <sup>2</sup> (%) | Number of hazard ratios         | Summary hazard ratio | I <sup>2</sup> (%) |
| Both men and women† |                       |                                             |                      |                    |                            |                      |                    |                                 |                      |                    |
|                     | All ages              | 27                                          | 0.95 (0.88-1.03)*    | 84.8               | 17                         | 0.98 (0.89-1.09)*    | 64.6               | 10                              | 0.91 (0.79-1.04)*    | 92.5               |
|                     | Mixed ages            | 20                                          | 1.02 (0.94-1.11)*    | 80.2               | 13                         | 1.03 (0.92-1.14)*    | 60.7               | 7                               | 1.01 (0.89-1.15)*    | 90.3               |
|                     | ≥ 65 only             | 7                                           | 0.75 (0.61-0.92)*    | 78.0               | 4                          | 0.82 (0.61-1.11)*    | 71.1               | 3                               | 0.63 (0.42-0.96)*    | 81.0               |
| Men                 |                       |                                             |                      |                    |                            |                      |                    |                                 |                      |                    |
|                     | All ages              | 12                                          | 0.92 (0.77-1.09)*    | 86.6               | 6                          | 0.84 (0.64-1.10)*    | 90.0               | 6                               | 1.00 (0.77-1.30)*    | 84.1               |
|                     | Mixed ages            | 10                                          | 0.90 (0.74-1.09)*    | 88.8               | 5                          | 0.81 (0.60-1.10)*    | 91.9               | 5                               | 0.98 (0.74-1.31)*    | 86.7               |
|                     | ≥ 65 only             | 2                                           | 1.07 (0.75-1.51)     | 0.0                | 1                          | 0.99 (0.61-1.61)     | 0.0                | 1                               | 1.15 (0.70-1.89)     | 0.0                |
| Women               |                       |                                             |                      |                    |                            |                      |                    |                                 |                      |                    |
|                     | All ages              | 14                                          | 0.98 (0.85-1.14)*    | 79.5               | 7                          | 0.96 (0.80-1.15)*    | 74.7               | 7                               | 1.01 (0.77-1.32)*    | 84.4               |
|                     | Mixed ages            | 12                                          | 0.94 (0.81-1.10)*    | 80.2               | 6                          | 0.94 (0.77-1.14)*    | 78.4               | 6                               | 0.95 (0.72-1.25)*    | 82.6               |
|                     | ≥ 65 only             | 2                                           | 1.39 (1.08-1.78)     | 0.0                | 1                          | 1.23 (0.73-2.06)     | 0.0                | 1                               | 1.44 (1.08-1.92)     | 0.0                |
| US and Canada       |                       |                                             |                      |                    |                            |                      |                    |                                 |                      |                    |
|                     | All ages              | 39                                          | 0.96 (0.88-1.05)*    | 89.1               | 18                         | 0.95 (0.83-1.09)*    | 84.4               | 21                              | 0.97 (0.87-1.08)*    | 90.6               |
|                     | Mixed ages            | 31                                          | 0.99 (0.90-1.08)*    | 89.6               | 14                         | 0.98 (0.83-1.16)*    | 86.8               | 17                              | 0.99 (0.88-1.11)*    | 90.1               |
|                     | ≥ 65 only             | 8                                           | 0.84 (0.67-1.05)*    | 82.5               | 4                          | 0.82 (0.61-1.11)*    | 71.1               | 4                               | 0.83 (0.52-1.34)*    | 89.2               |
| Europe              |                       |                                             |                      |                    |                            |                      |                    |                                 |                      |                    |
|                     | All ages              | 12                                          | 0.94 (0.83-1.06)*    | 69.8               | 12                         | 0.94 (0.83-1.06)*    | 69.8               | 0                               |                      |                    |
|                     | Mixed ages            | 10                                          | 0.92 (0.81-1.05)*    | 74.8               | 10                         | 0.92 (0.81-1.05)*    | 74.8               | 0                               |                      |                    |
|                     | ≥ 65 only             | 2                                           | 1.10 (0.77-1.56)     | 0.0                | 2                          | 1.10 (0.77-1.56)     | 0.0                | 0                               |                      |                    |
| Other regions       |                       |                                             |                      |                    |                            |                      |                    |                                 |                      |                    |
|                     | All ages              | 1                                           | 0.79 (0.56-1.11)     | 0.0                | 0                          |                      |                    | 1                               | 0.79 (0.56-1.11)     | 0.0                |
|                     | Mixed ages            | 0                                           |                      |                    | 0                          |                      |                    | 0                               |                      |                    |
|                     | ≥ 65 only             | 1                                           | 0.79 (0.56-1.11)     | 0.0                | 0                          |                      |                    | 1                               | 0.79 (0.56-1.11)     | 0.0                |

\* Significant heterogeneity (p<.05)

† Based only on hazard ratios from the studies that did not report results separately for men and women

© 2012 American Medical Association. All rights reserved.

**eTable 7.** Summary hazard ratios for all-cause mortality relative to normal weight for BMI ≥ 35 by age, sex, region and measurement type

| BMI category        | Baseline age category | Self-reported or measured height and weight |                      |                    | Measured height and weight |                      |                    | Self-reported height and weight |                      |                    |
|---------------------|-----------------------|---------------------------------------------|----------------------|--------------------|----------------------------|----------------------|--------------------|---------------------------------|----------------------|--------------------|
|                     |                       | Number of hazard ratios                     | Summary hazard ratio | I <sup>2</sup> (%) | Number of hazard ratios    | Summary hazard ratio | I <sup>2</sup> (%) | Number of hazard ratios         | Summary hazard ratio | I <sup>2</sup> (%) |
| Both men and women† |                       |                                             |                      |                    |                            |                      |                    |                                 |                      |                    |
|                     | All ages              | 27                                          | 1.29 (1.16-1.44)*    | 77.2               | 17                         | 1.29 (1.14-1.47)*    | 51.2               | 10                              | 1.29 (1.07-1.54)*    | 88.0               |
|                     | Mixed ages            | 20                                          | 1.43 (1.28-1.58)*    | 70.4               | 13                         | 1.40 (1.24-1.59)     | 36.4               | 7                               | 1.45 (1.22-1.73)*    | 86.1               |
|                     | ≥ 65 only             | 7                                           | 0.99 (0.86-1.15)     | 22.2               | 4                          | 1.04 (0.88-1.22)     | 0.0                | 3                               | 0.88 (0.60-1.30)     | 62.2               |
| Men                 |                       |                                             |                      |                    |                            |                      |                    |                                 |                      |                    |
|                     | All ages              | 12                                          | 1.26 (1.05-1.50)*    | 64.4               | 6                          | 1.13 (0.92-1.40)     | 42.4               | 6                               | 1.41 (1.04-1.91)*    | 76.7               |
|                     | Mixed ages            | 10                                          | 1.18 (1.01-1.39)*    | 60.3               | 5                          | 1.08 (0.91-1.28)     | 25.4               | 5                               | 1.31 (0.98-1.74)*    | 76.0               |
|                     | ≥ 65 only             | 2                                           | 2.84 (1.48-5.46)     | 0.0                | 1                          | 2.54 (0.99-6.49)     | 0.0                | 1                               | 3.16 (1.27-7.85)     | 0.0                |
| Women               |                       |                                             |                      |                    |                            |                      |                    |                                 |                      |                    |
|                     | All ages              | 14                                          | 1.34 (1.09-1.66)*    | 86.5               | 7                          | 1.26 (0.96-1.64)*    | 82.2               | 7                               | 1.43 (0.99-2.06)*    | 90.3               |
|                     | Mixed ages            | 12                                          | 1.26 (1.02-1.57)*    | 86.9               | 6                          | 1.23 (0.92-1.64)*    | 84.9               | 6                               | 1.30 (0.90-1.88)*    | 89.5               |
|                     | ≥ 65 only             | 2                                           | 2.28 (1.54-3.38)     | 5.7                | 1                          | 1.63 (0.77-3.46)     | 0.0                | 1                               | 2.57 (1.67-3.95)     | 0.0                |
| US and Canada       |                       |                                             |                      |                    |                            |                      |                    |                                 |                      |                    |
|                     | All ages              | 39                                          | 1.30 (1.17-1.45)*    | 85.9               | 18                         | 1.23 (1.07-1.43)*    | 74.5               | 21                              | 1.36 (1.17-1.58)*    | 89.3               |
|                     | Mixed ages            | 31                                          | 1.34 (1.19-1.50)*    | 86.7               | 14                         | 1.31 (1.10-1.56)*    | 78.6               | 17                              | 1.36 (1.16-1.59)*    | 89.6               |
|                     | ≥ 65 only             | 8                                           | 1.14 (0.86-1.50)*    | 76.6               | 4                          | 1.04 (0.88-1.22)     | 0.0                | 4                               | 1.36 (0.68-2.74)*    | 88.9               |
| Europe              |                       |                                             |                      |                    |                            |                      |                    |                                 |                      |                    |
|                     | All ages              | 12                                          | 1.32 (1.17-1.48)     | 21.4               | 12                         | 1.32 (1.17-1.48)     | 21.4               | 0                               |                      |                    |
|                     | Mixed ages            | 10                                          | 1.30 (1.15-1.46)     | 24.3               | 10                         | 1.30 (1.15-1.46)     | 24.3               | 0                               |                      |                    |
|                     | ≥ 65 only             | 2                                           | 1.94 (1.08-3.49)     | 0.0                | 2                          | 1.94 (1.08-3.49)     | 0.0                | 0                               |                      |                    |
| Other regions       |                       |                                             |                      |                    |                            |                      |                    |                                 |                      |                    |
|                     | All ages              | 1                                           | 1.09 (0.69-1.71)     | 0.0                | 0                          |                      |                    | 1                               | 1.09 (0.69-1.71)     | 0.0                |
|                     | Mixed ages            | 0                                           |                      |                    | 0                          |                      |                    | 0                               |                      |                    |
|                     | ≥ 65 only             | 1                                           | 1.09 (0.69-1.71)     | 0.0                | 0                          |                      |                    | 1                               | 1.09 (0.69-1.71)     | 0.0                |

\* Significant heterogeneity (p<.05)

† Based only on hazard ratios from the studies that did not report results separately for men and women

© 2012 American Medical Association. All rights reserved.

**eTable 8.** Summary hazard ratios for all-cause mortality relative to normal weight for possibly over-adjusted studies, by BMI category, age and measurement type

| BMI category | Baseline age category | Self-reported or measured height and weight |                      |                    | Measured height and weight |                      |                    | Self-reported height and weight |                      |                    |
|--------------|-----------------------|---------------------------------------------|----------------------|--------------------|----------------------------|----------------------|--------------------|---------------------------------|----------------------|--------------------|
|              |                       | Number of hazard ratios                     | Summary hazard ratio | I <sup>2</sup> (%) | Number of hazard ratios    | Summary hazard ratio | I <sup>2</sup> (%) | Number of hazard ratios         | Summary hazard ratio | I <sup>2</sup> (%) |
| BMI 25-<30   |                       |                                             |                      |                    |                            |                      |                    |                                 |                      |                    |
|              | All ages              | 40                                          | 0.93 (0.88-0.97)*    | 81.4               | 32                         | 0.91 (0.86-0.97)*    | 80.8               | 8                               | 0.97 (0.89-1.05)*    | 84.6               |
|              | Mixed ages            | 26                                          | 0.94 (0.89-1.00)*    | 82.9               | 22                         | 0.92 (0.86-0.98)*    | 84.8               | 4                               | 1.07 (0.98-1.16)     | 35.6               |
|              | ≥ 65 only             | 14                                          | 0.89 (0.82-0.97)*    | 68.3               | 10                         | 0.88 (0.75-1.02)     | 48.4               | 4                               | 0.89 (0.79-1.00)*    | 87.1               |
| BMI ≥ 30     |                       |                                             |                      |                    |                            |                      |                    |                                 |                      |                    |
|              | All ages              | 28                                          | 1.10 (1.01-1.21)*    | 80.9               | 22                         | 1.08 (0.96-1.21)*    | 81.7               | 6                               | 1.15 (1.00-1.34)*    | 80.7               |
|              | Mixed ages            | 17                                          | 1.17 (1.05-1.31)*    | 82.9               | 14                         | 1.15 (1.01-1.32)*    | 84.7               | 3                               | 1.24 (0.99-1.54)     | 71.2               |
|              | ≥ 65 only             | 11                                          | 0.99 (0.86-1.14)*    | 63.9               | 8                          | 0.92 (0.78-1.08)     | 31.8               | 3                               | 1.10 (0.87-1.38)*    | 83.0               |
| BMI 30-<35   |                       |                                             |                      |                    |                            |                      |                    |                                 |                      |                    |
|              | All ages              | 10                                          | 0.82 (0.69-0.96)*    | 75.6               | 8                          | 0.72 (0.64-0.81)     | 22.6               | 2                               | 1.07 (0.59-1.92)*    | 93.8               |
|              | Mixed ages            | 8                                           | 0.82 (0.65-1.04)*    | 80.3               | 7                          | 0.72 (0.64-0.82)     | 30.5               | 1                               | 1.46 (1.12-1.91)     | 0.0                |
|              | ≥ 65 only             | 2                                           | 0.80 (0.71-0.90)     | 0.0                | 1                          | 0.83 (0.49-1.42)     | 0.0                | 1                               | 0.80 (0.71-0.90)     | 0.0                |
| BMI ≥ 35     |                       |                                             |                      |                    |                            |                      |                    |                                 |                      |                    |
|              | All ages              | 10                                          | 1.02 (0.86-1.21)     | 48.4               | 8                          | 0.92 (0.78-1.09)     | 22.2               | 2                               | 1.25 (0.80-1.96)     | 78.5               |
|              | Mixed ages            | 8                                           | 1.04 (0.82-1.33)*    | 59.3               | 7                          | 0.93 (0.76-1.13)     | 33.3               | 1                               | 1.62 (1.12-2.35)     | 0.0                |
|              | ≥ 65 only             | 2                                           | 1.01 (0.84-1.22)     | 0.0                | 1                          | 0.92 (0.47-1.80)     | 0.0                | 1                               | 1.02 (0.84-1.24)     | 0.0                |

\* Significant heterogeneity (p<.05)

**eTable 9.** Approximate hazard ratio estimates for overweight and obesity relative to normal weight constructed from selected recent large studies that used finer body mass index categories

| Source                       | Study                                                                       | Weight and height                      | Sample size | BMI    |       |        |       |
|------------------------------|-----------------------------------------------------------------------------|----------------------------------------|-------------|--------|-------|--------|-------|
|                              |                                                                             |                                        |             | Men    |       | Women  |       |
|                              |                                                                             |                                        |             | 25-<30 | >30   | 25-<30 | >30   |
| Jacobs, <sup>9</sup> 2010    | Cancer Prevention Study II (US)                                             | Self-reported                          | 104 843     | 0.91   | 1.10  | 0.96   | 1.26  |
| Jee, <sup>10</sup> 2006      | Korean Cancer Prevention Study                                              | Measured                               | 1 213 829   | 1.03   | 1.75  | 1.01   | 1.18  |
| Klenk, <sup>11</sup> 2009    | Vorarlberg Health Monitoring and Promotion Program (Austria)                | Measured                               | 184 697     | 0.95   | 1.25  | 1.04   | 1.32  |
| Pischon, <sup>12</sup> 2008  | European Prospective Investigation into Cancer and Nutrition                | Measured                               | 147 857     | 0.92   | 1.29  | 1.01   | 1.25  |
| Whitlock, <sup>13</sup> 2009 | Prospective Studies Collaboration (mostly Western Europe and North America) | Primarily measured, some self-reported | 894 576     | 1.06*  | 1.46* | 1.06*  | 1.45* |
| Zheng, <sup>14</sup> 2011    | Asia Cohort Consortium BMI Project (East Asians)                            | Some measured, some self-reported      | 479 492     | 0.93†  | 1.23† | 1.01†  | 1.26† |
| Zheng, <sup>14</sup> 2011    | Asia Cohort Consortium BMI Project (Indians and Bangladeshis)               | Measured                               | 209 596     | 0.93†  | 1.17† | 0.91†  | 0.90† |

\* Reference category is 20-<25.

† Lifelong non-smokers only Reference category is 20.1-25, Overweight is 25.1-30, obesity is 30.1 or above.

**eFigure.** Study selection flow diagram

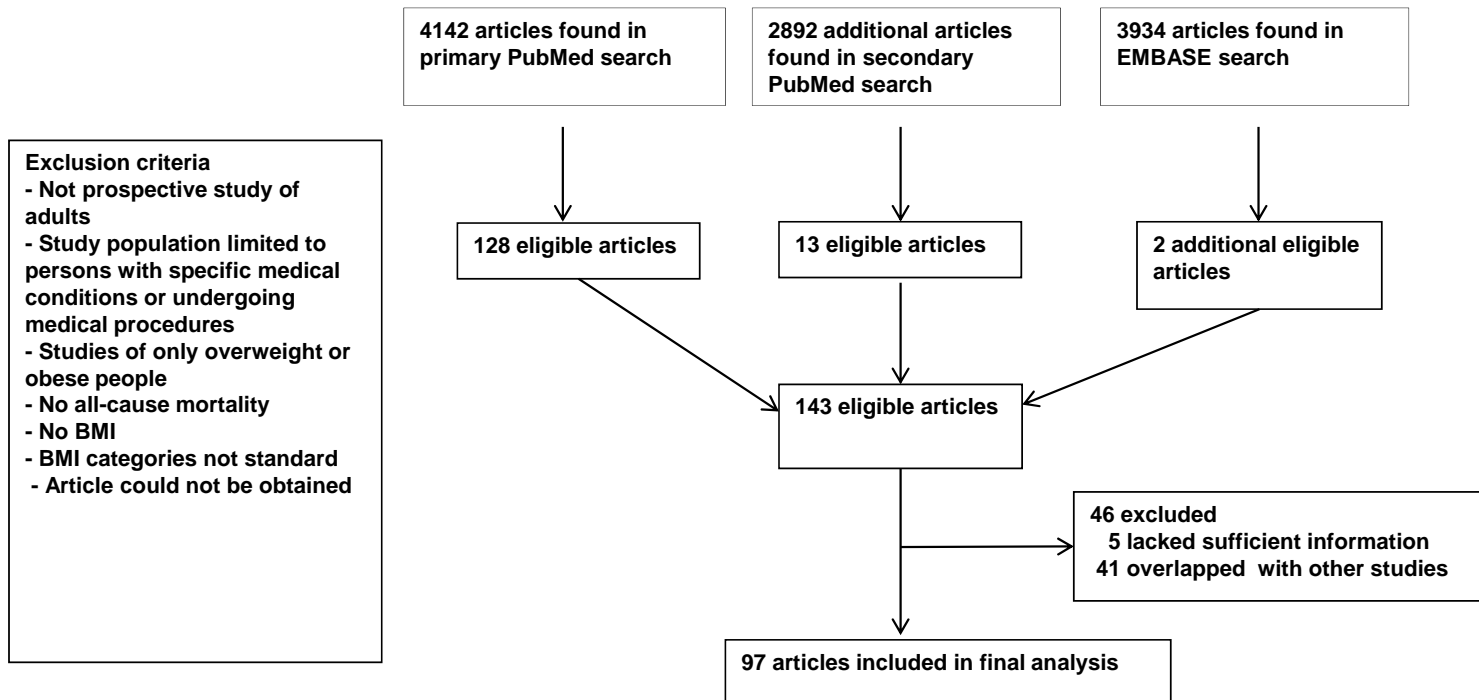



## eReferences

- (1) Al Snih S, Ottenbacher KJ, Markides KS, Kuo YF, Eschbach K, Goodwin JS. The effect of obesity on disability vs mortality in older Americans. *Arch Intern Med* 2007;167:774-780.
- (2) Arndt V, Rothenbacher D, Zschenderlein B, Schubert S, Brenner H. Body Mass Index and Premature Mortality in Physically Heavily Working Men-A Ten-Year Follow-Up of 20,000 Construction Workers. *J Occup Environ Med* 2007;49:913-921.
- (3) Arnlov J, Ingelsson E, Sundstrom J, Lind L. Impact of body mass index and the metabolic syndrome on the risk of cardiovascular disease and death in middle-aged men. *Circulation* 2010;121:230-236.
- (4) Atlantis E, Browning C, Kendig H. Body mass index and unintentional weight change associated with all-cause mortality in older Australians: the Melbourne Longitudinal Studies on Healthy Ageing (MELSHA). *Age Ageing* 2010;39:643-646.
- (5) Baldinger B, Schwarz C, Jaggy C. Cardiovascular risk factors, BMI and mortality in a cohort of Swiss males (1976-2001) with high-sum-assured life insurance cover. *J Insur Med* 2006;38:44-53.
- (6) Batty GD, Shipley MJ, Jarrett RJ, Breeze E, Marmot MG, Davey Smith G. Obesity and overweight in relation to disease-specific mortality in men with and without existing coronary heart disease in London: the original Whitehall study. *Heart* 2006;92:886-892.
- (7) Belloc R, Jia C, Ye W, Lagerros YT. Effects of physical activity, body mass index, waist-to-hip ratio and waist circumference on total mortality risk in the Swedish National March Cohort. *Eur J Epidemiol* 2010;25:777-788.
- (8) Bessonova L, Marshall SF, Ziogas A et al. The association of body mass index with mortality in the California Teachers Study. *Int J Cancer* 2011;129:2492-2501.
- (9) Bevilacqua MR, Gimeno SG. Abdominal obesity in Japanese-Brazilians: which measure is best for predicting all-cause and cardiovascular mortality? *Cad Saude Publica* 2011;27:1986-1996.
- (10) Blain H, Carriere I, Sourial N et al. Balance and walking speed predict subsequent 8-year mortality independently of current and intermediate events in well-functioning women aged 75 years and older. *J Nutr Health Aging* 2010;14:595-600.

- (11) Boggs DA, Rosenberg L, Cozier YC et al. General and abdominal obesity and risk of death among black women. *N Engl J Med* 2011;365:901-908.
- (12) Cabrera MA, Wajngarten M, Gebara OC, Diament J. [Relationship between body mass index, waist circumference, and waist-to-hip ratio and mortality in elderly women: a 5-year follow-up study]. *Cad Saude Publica* 2005;21:767-775.
- (13) Carlsson S, Andersson T, de Faire U, Lichtenstein P, Michaelsson K, Ahlbom A. Body mass index and mortality: is the association explained by genetic factors? *Epidemiology* 2011;22:98-103.
- (14) Cesari M, Pahor M, Lauretani F et al. Skeletal muscle and mortality results from the InCHIANTI Study. *J Gerontol A Biol Sci Med Sci* 2009;64:377-384.
- (15) Cohen SS, Signorello LB, Cope EL et al. Obesity and all-cause mortality among black adults and white adults. *Am J Epidemiol* 2012;176:431-442.
- (16) Corrada MM, Kawas CH, Mozaffar F, Paganini-Hill A. Association of body mass index and weight change with all-cause mortality in the elderly. *Am J Epidemiol* 2006;163:938-949.
- (17) Crespo CJ, Palmieri MR, Perdomo RP et al. The relationship of physical activity and body weight with all-cause mortality: results from the Puerto Rico Heart Health Program. *Ann Epidemiol* 2002;12:543-552.
- (18) Faeh D, Braun J, Tarnutzer S, Bopp M. Obesity but not overweight is associated with increased mortality risk. *Eur J Epidemiol* 2011;26:647-655.
- (19) Fang X, Tang Z, Xiang M et al. [The relationship between body mass index, hypertension and all-cause mortality in the population over 55 year old in Beijing]. *Zhonghua Liu Xing Bing Xue Za Zhi* 2002;23:28-31.
- (20) Farrell SW, Braun L, Barlow CE, Cheng YJ, Blair SN. The relation of body mass index, cardiorespiratory fitness, and all-cause mortality in women. *Obes Res* 2002;10:417-423.
- (21) Ferrie JE, Singh-Manoux A, Kivimaki M et al. Cardiorespiratory risk factors as predictors of 40-year mortality in women and men. *Heart* 2009;95:1250-1257.
- (22) Flegal KM, Graubard BI, Williamson DF, Gail MH. Impact of smoking and preexisting illness on estimates of the fractions of deaths associated with underweight, overweight, and obesity in the US population. *Am J Epidemiol* 2007;166:975-982.
- (23) Flicker L, McCaul KA, Hankey GJ et al. Body mass index and survival in men and women aged 70 to 75. *J Am Geriatr Soc* 2010;58:234-241.

- (24) Fontaine KR, McCubrey R, Mehta T et al. Body mass index and mortality rate among Hispanic adults: a pooled analysis of multiple epidemiologic data sets. *Int J Obes (Lond)* 2012;36:1121-1126.
- (25) Ford J, Spallek M, Dobson A. Self-rated health and a healthy lifestyle are the most important predictors of survival in elderly women. *Age Ageing* 2008;37:194-200.
- (26) Freedman DM, Sigurdson AJ, Rajaraman P, Doody MM, Linet MS, Ron E. The mortality risk of smoking and obesity combined. *Am J Prev Med* 2006;31:355-362.
- (27) Fujino Y. Anthropometry, development history and mortality in the Japan Collaborative Cohort Study for Evaluation of Cancer (JACC). *Asian Pac J Cancer Prev* 2007;8 Suppl:105-112.
- (28) Gale CR, Martyn CN, Cooper C, Sayer AA. Grip strength, body composition, and mortality. *Int J Epidemiol* 2007;36:228-235.
- (29) Gelber RP, Kurth T, Manson JE, Buring JE, Gaziano JM. Body mass index and mortality in men: evaluating the shape of the association. *Int J Obes (Lond)* 2007;31:1240-1247.
- (30) Gray L, Hart CL, Davey Smith GD, Batty GD. What is the predictive value of established risk factors for total and cardiovascular disease mortality when measured before middle age? Pooled analyses of two prospective cohort studies from Scotland. *Eur J Cardiovasc Prev Rehabil* 2010;17:106-112.
- (31) Greenberg JA, Fontaine K, Allison DB. Putative biases in estimating mortality attributable to obesity in the US population. *Int J Obes (Lond)* 2007;31:1449-1455.
- (32) Gu D, He J, Duan X et al. Body weight and mortality among men and women in China. *JAMA* 2006;295:776-783.
- (33) Haapanen-Niemi N, Miilunpalo S, Pasanen M, Vuori I, Oja P, Malmberg J. Body mass index, physical inactivity and low level of physical fitness as determinants of all-cause and cardiovascular disease mortality--16 y follow-up of middle-aged and elderly men and women. *Int J Obes Relat Metab Disord* 2000;24:1465-1474.
- (34) Hanson RL, McCance DR, Jacobsson LT et al. The U-shaped association between body mass index and mortality: relationship with weight gain in a Native American population. *J Clin Epidemiol* 1995;48:903-916.
- (35) Heir T, Erikssen J, Sandvik L. Overweight as predictor of long-term mortality among healthy, middle-aged men: A prospective cohort study. *Prev Med* 2011;52:223-226.

- (36) Hjartaker A, Adami HO, Lund E, Weiderpass E. Body mass index and mortality in a prospectively studied cohort of Scandinavian women: the women's lifestyle and health cohort study. *Eur J Epidemiol* 2005;20:747-754.
- (37) Hotchkiss JW, Leyland AH. The relationship between body size and mortality in the linked Scottish Health Surveys: cross-sectional surveys with follow-up. *Int J Obes (Lond)* 2011;35:838-851.
- (38) Hu G, Tuomilehto J, Silventoinen K, Barengo NC, Peltonen M, Jousilahti P. The effects of physical activity and body mass index on cardiovascular, cancer and all-cause mortality among 47 212 middle-aged Finnish men and women. *Int J Obes (Lond)* 2005;29:894-902.
- (39) Ioachimescu AG, Brennan DM, Hoar BM, Hoogwerf BJ. The lipid accumulation product and all-cause mortality in patients at high cardiovascular risk: a PreCIS database study. *Obesity (Silver Spring)* 2010;18:1836-1844.
- (40) Iribarren C, Jacobs DR, Kiefe CI et al. Causes and demographic, medical, lifestyle and psychosocial predictors of premature mortality: the CARDIA study. *Soc Sci Med* 2005;60:471-482.
- (41) Iversen L, Hannaford PC, Lee AJ, Elliott AM, Fielding S. Impact of lifestyle in middle-aged women on mortality: evidence from the Royal College of General Practitioners' Oral Contraception Study. *Br J Gen Pract* 2010;60:563-569.
- (42) Janssen I. Morbidity and mortality risk associated with an overweight BMI in older men and women. *Obesity (Silver Spring)* 2007;15:1827-1840.
- (43) Janssen I, Bacon E. Effect of Current and Midlife Obesity Status on Mortality Risk in the Elderly. *Obesity (Silver Spring)* 2008;16:2504-2509.
- (44) Jerant A, Franks P. Body mass index, diabetes, hypertension, and short-term mortality: a population-based observational study, 2000-2006. *J Am Board Fam Med* 2012;25:422-431.
- (45) Jonsson S, Hedblad B, Engstrom G, Nilsson P, Berglund G, Janzon L. Influence of obesity on cardiovascular risk. Twenty-three-year follow-up of 22,025 men from an urban Swedish population. *Int J Obes Relat Metab Disord* 2002;26:1046-1053.
- (46) Katzmarzyk PT, Craig CL, Bouchard C. Original article underweight, overweight and obesity: relationships with mortality in the 13-year follow-up of the Canada Fitness Survey. *J Clin Epidemiol* 2001;54:916-920.
- (47) Katzmarzyk PT, Reeder BA, Elliott S et al. Body mass index and risk of cardiovascular disease, cancer and all-cause mortality. *Can J Public Health* 2012;103:147-151.

- (48) Keller HH, Ostbye T. Body Mass Index (BMI), BMI change and mortality in community-dwelling seniors without dementia. *J Nutr Health Aging* 2005;9:316-320.
- (49) Kreuger PM, Rogers RG, Hummer RA, Boardman JD. Body mass index, smoking, and overall and cause-specific mortality among older U.S. adults. *Research on Aging* 2004;26:82-107.
- (50) Lahmann PH, Lissner L, Gullberg B, Berglund G. A prospective study of adiposity and all-cause mortality: the Malmo Diet and Cancer Study. *Obes Res* 2002;10:361-369.
- (51) Lakoski SG, Le AH, Muntner P et al. Adiposity, inflammation, and risk for death in black and white men and women in the United States: the Reasons for Geographic and Racial Differences in Stroke (REGARDS) study. *J Clin Endocrinol Metab* 2011;96:1805-1814.
- (52) Lang IA, Llewellyn DJ, Alexander K, Melzer D. Obesity, physical function, and mortality in older adults. *J Am Geriatr Soc* 2008;56:1474-1478.
- (53) Lantz PM, Golberstein E, House JS, Morenoff J. Socioeconomic and behavioral risk factors for mortality in a national 19-year prospective study of U.S. adults. *Soc Sci Med* 2010;70:1558-1566.
- (54) Lawlor DA, Hart CL, Hole DJ, Davey SG. Reverse causality and confounding and the associations of overweight and obesity with mortality. *Obesity (Silver Spring)* 2006;14:2294-2304.
- (55) Leitzmann MF, Moore SC, Koster A et al. Waist circumference as compared with body-mass index in predicting mortality from specific causes. *PLoS ONE* 2011;6:e18582.
- (56) Lisko I, Tiainen K, Stenholm S, Luukkaala T, Hervonen A, Jylha M. Body mass index, waist circumference, and waist-to-hip ratio as predictors of mortality in nonagenarians: the Vitality 90+ Study. *J Gerontol A Biol Sci Med Sci* 2011;66:1244-1250.
- (57) Locher JL, Roth DL, Ritchie CS et al. Body mass index, weight loss, and mortality in community-dwelling older adults. *J Gerontol A Biol Sci Med Sci* 2007;62:1389-1392.
- (58) Lubin F, Lusky A, Chetrit A, Dankner R. Lifestyle and ethnicity play a role in all-cause mortality. *J Nutr* 2003;133:1180-1185.
- (59) Luchsinger JA, Patel B, Tang MX, Schupf N, Mayeux R. Body mass index, dementia, and mortality in the elderly. *J Nutr Health Aging* 2008;12:127-131.

- (60) Ma J, Flanders WD, Ward EM, Jemal A. Body mass index in young adulthood and premature death: analyses of the US National Health Interview Survey linked mortality files. *Am J Epidemiol* 2011;174:934-944.
- (61) Majer IM, Nusselder WJ, Mackenbach JP, Kunst AE. Life expectancy and life expectancy with disability of normal weight, overweight, and obese smokers and nonsmokers in Europe. *Obesity (Silver Spring)* 2011;19:1451-1459.
- (62) McAuley PA, Kokkinos PF, Oliveira RB, Emerson BT, Myers JN. Obesity paradox and cardiorespiratory fitness in 12,417 male veterans aged 40 to 70 years. *Mayo Clin Proc* 2010;85:115-121.
- (63) McTigue K, Larson JC, Valoski A et al. Mortality and cardiac and vascular outcomes in extremely obese women. *JAMA* 2006;296:79-86.
- (64) Mehta NK, Chang VW. Mortality attributable to obesity among middle-aged adults in the United States. *Demography* 2009;46:851-872.
- (65) Miller MD, Crotty M, Giles LC et al. Corrected arm muscle area: an independent predictor of long-term mortality in community-dwelling older adults? *J Am Geriatr Soc* 2002;50:1272-1277.
- (66) Monteverde M, Noronha K, Palloni A, Novak B. Obesity and excess mortality among the elderly in the United States and Mexico. *Demography* 2010;47:79-96.
- (67) Nagai M, Kuriyama S, Kakizaki M et al. Impact of obesity, overweight and underweight on life expectancy and lifetime medical expenditures: the Ohsaki Cohort Study. *BMJ Open* 2012;2.
- (68) Nechuta SJ, Shu XO, Li HL et al. Combined impact of lifestyle-related factors on total and cause-specific mortality among Chinese women: prospective cohort study. *PLoS Med* 2010;7.
- (69) Niedhammer I, Bourgkard E, Chau N. Occupational and behavioural factors in the explanation of social inequalities in premature and total mortality: a 12.5-year follow-up in the Lorhandicap study. *Eur J Epidemiol* 2011;26:1-12.
- (70) Orpana HM, Berthelot JM, Kaplan MS, Feeny DH, McFarland B, Ross NA. BMI and mortality: results from a national longitudinal study of Canadian adults. *Obesity (Silver Spring)* 2010;18:214-218.
- (71) Osler M, Heitmann BL, Hoidrup S, Jorgensen LM, Schroll M. Food intake patterns, self rated health and mortality in Danish men and women. A prospective observational study. *J Epidemiol Community Health* 2001;55:399-403.

- (72) Pednekar MS, Hakama M, Hebert JR, Gupta PC. Association of body mass index with all-cause and cause-specific mortality: findings from a prospective cohort study in Mumbai (Bombay), India. *Int J Epidemiol* 2008;37:524-535.
- (73) Petursson H, Sigurdsson JA, Bengtsson C, Nilsen TI, Getz L. Body configuration as a predictor of mortality: comparison of five anthropometric measures in a 12 year follow-up of the Norwegian HUNT 2 study. *PLoS ONE* 2011;6:e26621.
- (74) Ringback Weitof G., Eliasson M, Rosen M. Underweight, overweight and obesity as risk factors for mortality and hospitalization. *Scand J Public Health* 2008;36:169-176.
- (75) Seccareccia F, Lanti M, Menotti A, Scanga M. Role of body mass index in the prediction of all cause mortality in over 62,000 men and women. The Italian RIFLE Pooling Project. Risk Factor and Life Expectancy. *J Epidemiol Community Health* 1998;52:20-26.
- (76) Seidell JC, Verschuren WM, van Leer EM, Kromhout D. Overweight, underweight, and mortality. A prospective study of 48,287 men and women. *Arch Intern Med* 1996;156:958-963.
- (77) Simpson JA, MacInnis RJ, Peeters A, Hopper JL, Giles GG, English DR. A comparison of adiposity measures as predictors of all-cause mortality: the Melbourne Collaborative Cohort Study. *Obesity (Silver Spring)* 2007;15:994-1003.
- (78) Sonestedt E, Gullberg B, Ericson U, Wirfalt E, Hedblad B, Orho-Melander M. Association between fat intake, physical activity and mortality depending on genetic variation in FTO. *Int J Obes (Lond)* 2011;35:1041-1049.
- (79) Stessman J, Jacobs JM, Ein-Mor E, Bursztyn M. Normal Body Mass Index Rather than Obesity Predicts Greater Mortality in Elderly People: The Jerusalem Longitudinal Study. *J Am Geriatr Soc* 2009.
- (80) Stevens J, Cai J, Juhaeri, Thun MJ, Wood JL. Evaluation of WHO and NHANES II standards for overweight using mortality rates. *J Am Diet Assoc* 2000;100:825-827.
- (81) Strawbridge WJ, Wallhagen MI, Shema SJ. New NHLBI clinical guidelines for obesity and overweight: will they promote health? *Am J Public Health* 2000;90:340-343.
- (82) Suadicani P, Hein HO, von Eyben FE, Gyntelberg F. Metabolic and lifestyle predictors of ischemic heart disease and all-cause mortality among normal weight, overweight, and obese men: a 16-year follow-up in the Copenhagen Male Study. *Metab Syndr Relat Disord* 2009;7:97-104.

- (83) Sui X, LaMonte MJ, Laditka JN et al. Cardiorespiratory fitness and adiposity as mortality predictors in older adults. *JAMA* 2007;298:2507-2516.
- (84) Takata Y, Ansai T, Soh I et al. Association between body mass index and mortality in an 80-year-old population. *J Am Geriatr Soc* 2007;55:913-917.
- (85) Taylor DH, Jr., Ostbye T. The effect of middle- and old-age body mass index on short-term mortality in older people. *J Am Geriatr Soc* 2001;49:1319-1326.
- (86) Tice JA, Kanaya A, Hue T et al. Risk factors for mortality in middle-aged women. *Arch Intern Med* 2006;166:2469-2477.
- (87) Tsai SP, Donnelly RP, Wendt JK. Obesity and mortality in a prospective study of a middle-aged industrial population. *J Occup Environ Med* 2006;48:22-27.
- (88) Tsai SP, Wen CP, Chan HT, Chiang PH, Tsai MK, Cheng TY. The effects of pre-disease risk factors within metabolic syndrome on all-cause and cardiovascular disease mortality. *Diabetes Res Clin Pract* 2008;82:148-156.
- (89) Uretsky S, Supariwala A, Singh P et al. Impact of weight on long-term survival among patients without known coronary artery disease and a normal stress SPECT MPI. *J Nucl Cardiol* 2010;17:390-397.
- (90) van Dam RM, Li T, Spiegelman D, Franco OH, Hu FB. Combined impact of lifestyle factors on mortality: prospective cohort study in US women. *BMJ* 2008;337:a1440.
- (91) Visscher TL, Seidell JC, Menotti A et al. Underweight and overweight in relation to mortality among men aged 40-59 and 50-69 years: the Seven Countries Study. *Am J Epidemiol* 2000;151:660-666.
- (92) Visscher TL, Rissanen A, Seidell JC et al. Obesity and unhealthy life-years in adult Finns: an empirical approach. *Arch Intern Med* 2004;164:1413-1420.
- (93) Walter S, Kunst A, Mackenbach J, Hofman A, Tiemeier H. Mortality and disability: the effect of overweight and obesity. *Int J Obes (Lond)* 2009;33:1410-1418.
- (94) Wandell PE, Carlsson AC, Theobald H. The association between BMI value and long-term mortality. *Int J Obes (Lond)* 2009;33:577-582.
- (95) Wannamethee SG, Shaper AG, Lennon L, Whincup PH. Decreased muscle mass and increased central adiposity are independently related to mortality in older men. *Am J Clin Nutr* 2007;86:1339-1346.
- (96) Yates LB, Djousse L, Kurth T, Buring JE, Gaziano JM. Exceptional longevity in men: modifiable factors associated with survival and function to age 90 years. *Arch Intern Med* 2008;168:284-290.



- (97) Zunzunegui MV, Sanchez MT, Garcia A, Casado JM, Otero A. Body mass index and long-term mortality in an elderly Mediterranean population. *J Aging Health* 2012;24:29-47.
